# Supplementary material for: The mTORC1/4E-BP1 axis represents a critical signaling node during fibrogenesis
Source: PubMed Central journal article supplement (PMC6315032; doi:10.1038/s41467-018-07858-8), 2019-01-02

**The mTORC1/4E-BP1 axis represents a critical signalling node during fibrogenesis**

**Woodcock, Eley et al.**

## List of Supplementary materials

### Supplementary methods

**Supplementary Table 1.** Antibodies used for Western blotting.

Kinobead assay

Matrisome proteomics methods

- Proteomic sample preparation
- LC-MS/MS analysis
- Protein Identification and quantification
- Statistical analysis of MS data
- MS data representation

### Supplementary Tables and Figures

**Supplementary Table 2.** pIC<sub>50</sub> in recombinant assays for pharmacological inhibitors used in fibroblast cultures and tissue slice experiments.

**Supplementary Figure 1.** Structures of pharmacological inhibitors used in fibroblast culture and tissue slice studies.

**Supplementary Table 3.** pIC<sub>50</sub> in a macromolecular crowding assay for AZD8055 in human lung fibroblasts derived from control and IPF lungs.

**Supplementary Figure 2.** MS-based kinase-binding profile of AZD8055 and CZ415 compounds across a set of lipid kinases identified from mixed human cell-line lysates.

**Supplementary Table 4.** Kinases quantified in profiling of AZD8055 and CZ415.

**Supplementary Figure 3.** Torin-1 and Compound 1 inhibit TGF- $\beta$ <sub>1</sub>-induced phosphorylation of mTOR substrates in normal human lung fibroblasts.

**Supplementary Figure 4.** TGF- $\beta$ <sub>1</sub> induced mTORC1 signalling and collagen response is Akt and ERK independent

**Supplementary Figure 5** Effect of doxycycline treatment on untransduced control pHLFs

**Supplementary Table 5** Summary statistics of P1NP inhibition in precision-cut lung slices in response to incubation with CZ415

**Supplementary Figures 6-15** Uncropped Western blots for main manuscript and supplementary figures

**Supplemental Dataset 1 (kinobead profiling)**

**Supplemental Dataset 2 (expression proteomics)**

## Supplementary Materials

### Supplementary Methods

| Antibody                             | Cat no. (dilution) | Antibody                         | Cat no. (dilution)          |
|--------------------------------------|--------------------|----------------------------------|-----------------------------|
| Phospho-SMAD2 <sup>Ser465/467</sup>  | #3108 (1:1000)     | Phospho-4E-BP1 <sup>Ser65</sup>  | #9451 (1:2000)              |
| SMAD2                                | #3103 (1:2000)     | Phospho-4E-BP1 <sup>Thr70</sup>  | #13396 (1:1000)             |
| Phospho-SMAD3 <sup>Ser423/425</sup>  | #9520 (1:1000)     | 4E-BP1                           | #9644 (1:2000)              |
| SMAD3                                | #9523 (1:2000)     | Phospho-S6 <sup>Ser235/236</sup> | #4858 (1:1000)              |
| Phospho-Akt <sup>Thr308</sup>        | #2965 (1:1000)     | S6                               | #2217 (1:1000)              |
| Phospho-Akt <sup>Ser473</sup>        | #4060 (1:1000)     | Raptor                           | #2280 (1:1000)              |
| Akt                                  | #4691 (1:5000)     | Rictor                           | #2114 (1:1000)              |
| Phospho-NDRG1 <sup>Thr346</sup>      | #5482 (1:2000)     | mTOR                             | #2983 (1:1000)              |
| NDRG1                                | #9408 (1:5000)     | eIF4E                            | #9742 (1:1000)              |
| Phospho-PRAS40 <sup>Thr246</sup>     | #13175<br>(1:1000) | eIF4G                            | #2469 (1:1000)              |
| PRAS40                               | #2691<br>(1:1000)  | Phospho-TSC2 <sup>Ser939</sup>   | #3615 (1:1000)              |
| Phospho-GSK3 $\beta$ <sup>Ser9</sup> | #5558<br>(1:1000)  | TSC2                             | #3612 (1:2000)              |
| GSK3 $\beta$                         | #12456<br>(1:1000) | $\alpha$ -tubulin                | #9099 (1:4000)              |
| Phospho-p70S6K <sup>Thr389</sup>     | #9234 (1:1000)     | Phospho-TSC2<br>Ser664           | #133465 (Abcam)<br>(1:1000) |
| P70S6K                               | #9202 (1:1000)     | $\beta$ actin                    | #A5541 (Sigma)<br>(1:10000) |
| Phospho-4EBP1 <sup>Thr37/46</sup>    | #2855 (1:1000)     |                                  |                             |

**Supplementary Table 1 – Antibodies used for Western blotting.** All antibodies purchased from Cell Signalling unless otherwise stated.

### **Kinobead assay**

Competition binding assays were performed as described previously by using kinobeads<sup>1,2</sup>. Briefly, 1 mL (5 mg protein) cell extract was pre-incubated with test compound or vehicle for 45 min at 4°C followed by incubation with kinobeads for 1 hour at 4 °C. The beads were washed with lysis buffer and eluted with SDS sample buffer and subjected to SDS gel electrophoresis. Samples were further processed for LC-MS analysis.

### **Matrisome proteomics methods:**

#### **Proteomic sample preparation**

PBS-washed cell pellets were frozen in liquid N<sub>2</sub> and collectively lysed in 2% SDS, heated for 3 min at 95 °C in a thermomixer (Eppendorf), followed by digestion of DNA with Benzonase at 37 °C for 1.5 h. Lysate was cleared by centrifugation and protein concentration in the supernatant was determined by BCA assay. Proteins were reduced by DTT and alkylated with iodacetamide, separated on 4–12% NuPAGE (Life Technologies) gels and stained with colloidal Coomassie. Gel lanes were cut into three slices covering the entire separation range (~2 cm) and subjected to in-gel digestion. Peptide samples were labelled with 10-plex TMT (TMT10, ThermoFisher Scientific) reagents. The labelling reaction was performed in 40mM triethylammoniumbicarbonate, pH 8.53, at 22 °C and quenched with glycine. Labelled peptide extracts were combined to a single sample per experiment, and subjected to additional fractionation on an Ultimate3000 (Dionex) by using reverse-phase chromatography at pH 12 [1 mm Xbridge column (Waters)], as previously described<sup>3</sup>.

### **LC-MS/MS analysis**

Samples were dried in vacuum and resuspended in 0.05 % trifluoroacetic acid in water. Of the sample, 50% was injected into an Ultimate3000 nanoRLSC HPLC (Dionex) coupled to a Q-Exactive Mass Spectrometer (ThermoFisher Scientific). Peptides were trapped on a 5 mm x 300  $\mu\text{m}$  C18 column (Pepmap100, 5  $\mu\text{m}$ , 300 Å, Thermo Fisher Scientific) in water with 0.05 % TFA at 60 °C. Separation was performed on custom 50 cm x 100  $\mu\text{m}$  (ID) reversed-phase columns (Reprosil) at 55°C. Gradient elution was performed from 2% acetonitrile to 40% acetonitrile in 0.1% formic acid and 3.5 % DMSO over 2 hours. Samples were online injected into Q-Exactive plus mass spectrometers operating with a data-dependent top 10 method. MS spectra were acquired by using 70,000 resolution and an ion target of  $3 \times 10^6$ . Higher energy collisional dissociation (HCD) scans were performed with 33% NCE at 35,000 resolution (at  $m/z$  200), and the ion target settings was set to  $2 \times 10^5$  so as to avoid coalescence<sup>4</sup>.

The mass spectrometry proteomics data have been deposited to the ProteomeXchange Consortium via the PRIDE partner repository with the dataset identifier PXD010164<sup>5</sup>.

### **Protein identification and quantification:**

Mascot 2.4 (Matrix Science) was used for protein identification by using a 10 p.p.m. mass tolerance for peptide precursors and 20 mD (HCD) mass tolerance for fragment ions. Carbamidomethylation of cysteine residues and TMT modification of lysine residues were set as fixed modifications and methionine oxidation, and N-terminal acetylation of proteins and TMT modification of peptide N-termini were set as variable

modifications. The search database consisted of a customized version of the International Protein Index protein sequence database combined with a decoy version of this database created by using a script supplied by Matrix Science. Unless stated otherwise, we accepted protein identifications as described<sup>4</sup>. Reporter ion intensities were read from raw data and multiplied with ion accumulation times (the unit is milliseconds) so as to yield a measure proportional to the number of ions; this measure is referred to as ion area<sup>4</sup>. Spectra matching to peptides were filtered according to the following criteria: mascot ion score >15, signal-to-background of the precursor ion > 4, and signal-to-interference > 0.5<sup>6</sup>. Fold changes were corrected for isotope purity as described and adjusted for interference caused by co-eluting nearly isobaric peaks as estimated by the signal-to-interference measure<sup>7</sup>. Protein quantification was derived from individual spectra matching to distinct peptides by using a sum-based bootstrap algorithm; 95% confidence intervals were calculated for all protein fold changes that were quantified with more than three spectra<sup>6</sup>. Protein fold changes were only reported for proteins with at least 2 quantified unique peptide (QUP) matches.

### **Statistical analysis of MS data**

Proteins quantified with at least 2 unique peptide matches were divided into bins. The bins are constructed according to the number of quantified spectrum sequence matches. Each bin consists of at least 300 proteins. This data quality-dependent binning strategy is analogous to the procedure described previously<sup>8</sup>. For each protein fold change (FC) a p-value is calculated using a Z-test with a robust estimation of the mean and standard deviation (using the 15.87, 50, and 84.13 percentiles). The

standard deviation is calculated, per bin, from a distribution of proteins log<sub>2</sub> transformed fold changes. Subsequently, an adjustment for multiple hypothesis testing was performed on the full data set by using Benjamini-Hochberg (BH) correction<sup>9</sup>. Proteins are considered significantly regulated when p-value <0.05 and ≥30 % change in relative abundance with same direction in both replicates.

### **MS data representation**

Treatment effects were summarised as ratio to DMSO or TGF-β<sub>1</sub> for each condition. Briefly, the log<sub>2</sub> fold change for each replicate pair was calculated and the mean taken to represent overall effect. Core matrisome proteins (<http://matrisomeproject.mit.edu/other-resources/human-matrisome/>) and proteins involved in collagen synthesis and degradation (<https://reactome.org/PathwayBrowser/#/R-HSA-1650814>) were filtered for a |FC| >1.2 (treatment vs vehicle alone) for heatmap representation. The heatmap was generated in Rv3.3.3 using gplots (<https://cran.r-project.org/web/packages/gplots/index.html>) and protein dendrogram was sorted using the R package dendsort (<https://cran.r-project.org/web/packages/dendsort/index.html>).



## Supplementary Figures

| Compound Name                      | PI3K     |         |          |          | mTORC1/2*                       |           | DNA-PK | Target        | HSA% |
|------------------------------------|----------|---------|----------|----------|---------------------------------|-----------|--------|---------------|------|
|                                    | $\alpha$ | $\beta$ | $\gamma$ | $\delta$ | Biochemical (FRAP1)             | Kinobeats |        |               |      |
| <b>CZ415</b> <sup>10</sup>         | 5.5      | 5.1     | 5.1      | 5.2      | 8.3                             | 8.0       | 5.8    |               | 91.4 |
| <b>Torin 1</b> <sup>11</sup>       | 6.8      | 5.5     | 7.0      | 6.2      | ND                              | 7.2       | 7.6    |               | 96.5 |
| <b>AZD8055</b> <sup>12</sup>       | 5.5      | 4.7     | 5.3      | 5.8      | 8.2                             | 8.5       | 5.8    |               | 92.0 |
| <b>1 (Wyeth)</b> <sup>13</sup>     | 5.2      | 5.2     | 5.2      | 5.3      | 7.3                             | 7.0       | 7.3    |               | 96.6 |
| <b>2 (Genentech)</b> <sup>14</sup> | 7.4      | 6.9     | 7.3      | 7.2      | <4.3                            | <4.0      | 6.2    |               | 95.5 |
| <b>MK2206</b> <sup>15</sup>        | 4.4      | 4.7     | 4.4      | 4.8      | <4.3                            | ND        | <4.1   | AKT:<br>8.3** | 93.0 |
| <b>GSK2334470</b> <sup>16</sup>    | 4.9      | 4.6     | 4.9      | 4.9      | <10% inhibition<br>at 1 $\mu$ M | <5.3      | -      | PDK1:<br>8.6† | 94.3 |

**Supplementary Table 2. pIC<sub>50</sub> in recombinant assays for pharmacological inhibitors** (GlaxoSmithKline recombinant data unless otherwise stated). \*mTORC1/2 potency data were obtained from i) FRAP1 recombinant biochemical assay (similar to <sup>10</sup>) and ii) Kinobead chemoproteomic binding assay with antibody readout (similar to <sup>11</sup>). \*\* Data from <sup>12</sup> † Data from <sup>13</sup>. ND, not determined. HSA%: human serum albumin binding (%).

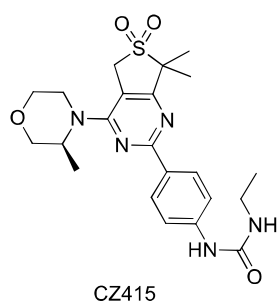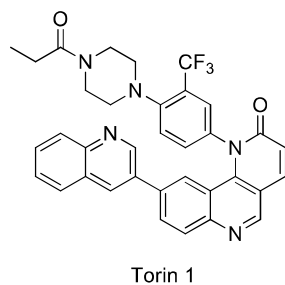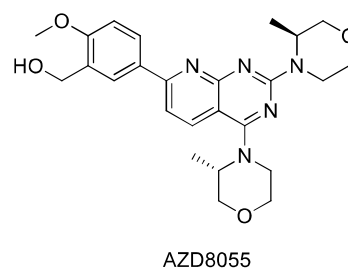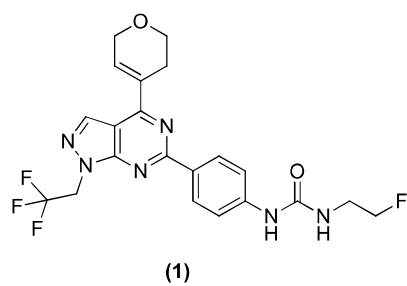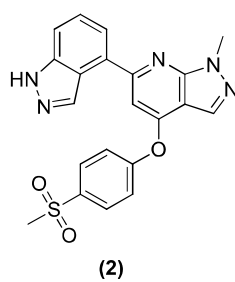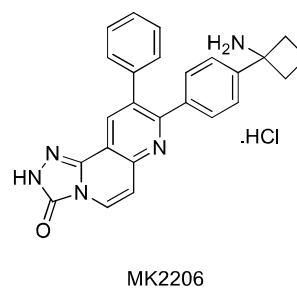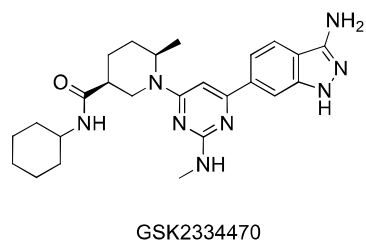

**Supplementary Figure 1. Structures of pharmacological inhibitors used in fibroblast culture and tissue slice studies.**

|                      | Donor ID | Log [M] = pIC <sub>50</sub> |
|----------------------|----------|-----------------------------|
| <b>Control lines</b> | Donor 1  | -7.43                       |
|                      | Donor 2  | -6.82                       |
|                      | Donor 3  | -6.43                       |
|                      | Donor 4  | -6.98                       |
|                      | Donor 5  | -6.43                       |
| <b>IPF lines</b>     | Donor 1  | -6.70                       |
|                      | Donor 2  | -7.01                       |
|                      | Donor 3  | -6.70                       |
|                      | Donor 4  | -6.22                       |
|                      | Donor 5  | -6.93                       |

**Supplementary Table 3: pIC<sub>50</sub> in a macromolecular crowding assay for AZD8055 in human lung fibroblasts derived from control and IPF donors.**

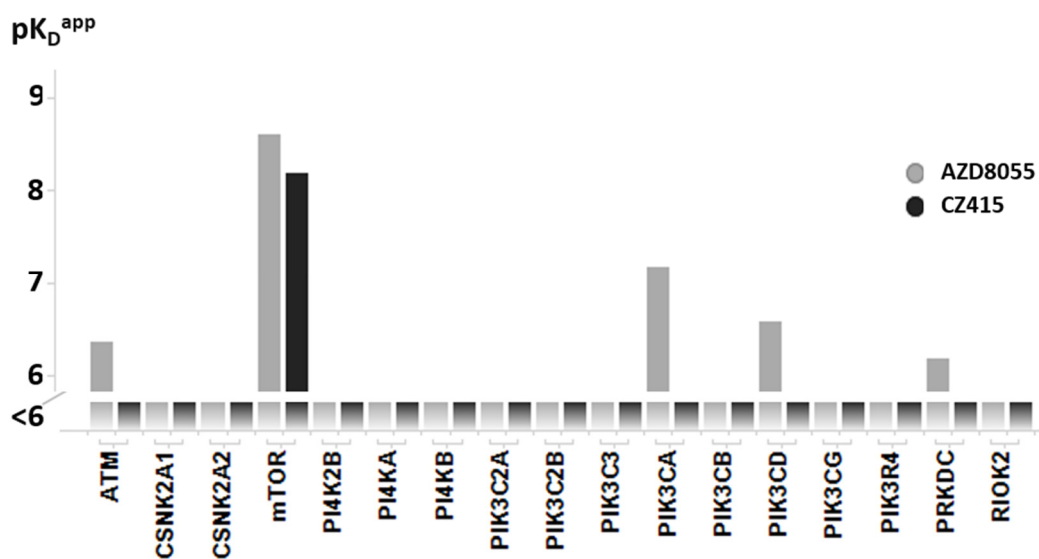

**Supplementary Figure 2. MS-based kinase-binding profile of AZD8055 and CZ415 compounds across a set of lipid kinases identified from mixed human cell-line lysates.** The bars indicate pK<sub>D</sub><sup>app</sup> values defined as the concentration of drug at which half-maximal competition of binding is observed, corrected by the influence of the immobilized ligand on the binding equilibrium using the Cheng–Prusoff equation<sup>17</sup>. Grey bars = AZD8055, black bars = CZ415.

|            |              |             |           |            |              |              |             |             |             |            |
|------------|--------------|-------------|-----------|------------|--------------|--------------|-------------|-------------|-------------|------------|
| AAK1       | BUB1         | CRKRS       | EPHB<br>3 | IKBKE      | MAP2K5       | MAPKAPK<br>5 | NTRK1       | PLK1        | RPS6KA<br>6 | TBK1       |
| ABL1       | CABC1        | CSF1R       | EPHB<br>4 | ILK        | MAP2K6       | MARK1        | OXR1        | PLK4        | RPS6KB<br>1 | TEC        |
| ABL2       | CAMK2B       | CSK         | EPHB<br>6 | INSR       | MAP3K1       | MARK2        | PAK4        | PRKAA1      | SGK3        | TEK        |
| ACVR1      | CAMK2D       | CSNK1A<br>1 | ERBB4     | IRAK1      | MAP3K11      | MARK3        | PCTK1       | PRKAA2      | SIK2        | TESK1      |
| ACVR1B     | CAMK2G       | CSNK1D      | ERN1      | IRAK3      | MAP3K15      | MARK4        | PCTK2       | PRKCA       | SLK         | TESK2      |
| ACVR2A     | CAMKK1       | CSNK1E      | FER       | IRAK4      | MAP3K2       | MAST2        | PCTK3       | PRKCB       | SNRK        | TGFBR<br>1 |
| ACVR2B     | CAMKK2       | CSNK2A<br>1 | FES       | ITK        | MAP3K3       | MAST3        | PDGFRB      | PRKCD       | SRC         | TGFBR<br>2 |
| ADCK1      | CDC2         | CSNK2A<br>2 | FGFR1     | JAK1       | MAP3K4       | MASTL        | PDIK1L      | PRKCI       | STK10       | TNIK       |
| AKT1       | CDC2L5       | DAPK1       | FGFR2     | JAK2       | MAP3K5       | MELK         | PDPK1       | PRKCO       | STK11       | TNK1       |
| AKT2       | CDC42BP<br>A | DAPK3       | FGFR3     | KDR        | MAP3K6       | MERTK        | PFTK1       | PRKCZ       | STK16       | TNK2       |
| ARAF       | CDC42BP<br>B | DDR1        | FGR       | QSK        | MAP3K7       | MET          | PHKG2       | PRKD1       | STK17A      | TP53RK     |
| AURKA      | CDC7         | DSTYK       | FLT4      | MLK4       | MAP4K2       | MINK1        | PIK3C3      | PRKD2       | STK17B      | TTK        |
| AURKB      | CDK10        | DYRK1A      | FRK       | KIT        | MAP4K3       | MKNK1        | PIK3R4      | PRKD3       | STK3        | TYK2       |
| AXL        | CDK2         | EGFR        | FYN       | KSR1       | MAP4K4       | MKNK2        | PIM1        | PRKG1       | STK33       | TYRO3      |
| BCR        | CDK5         | EIF2AK1     | GAK       | LATS1      | MAP4K5       | MST1R        | PIM2        | PRKX        | STK35       | ULK1       |
| BMP2K      | CDK7         | EIF2AK4     | GSK3<br>A | LIMK1      | MAPK1        | MYLK         | PIM3        | PTK2        | STK38       | ULK3       |
| BMPR1<br>A | CDK8         | EPHA1       | GSK3<br>B | LIMK2      | MAPK11       | MYLK3        | PIP4K2<br>A | PTK2B       | STK38L      | WEE1       |
| BMPR1<br>B | CDK9         | EPHA2       | HCK       | MAST4      | MAPK14       | NEK1         | PIP4K2<br>B | RIOK2       | STK39       | YES1       |
| BMPR2      | CDKL5        | EPHA3       | HIPK1     | LRRK2      | MAPK3        | NEK2         | PIP4K2<br>C | RIPK2       | STK4        | ZAK        |
| BMX        | CHEK1        | EPHA4       | HIPK2     | LYN        | MAPK6        | NEK3         | PIP5K3      | RPS6KA<br>1 | STRADA      |            |
| BRAF       | CHEK2        | EPHA5       | HIPK3     | MAP2K<br>1 | MAPK7        | NEK6         | PKMYT<br>1  | RPS6KA<br>2 | SYK         |            |
| BRSK1      | CHUK         | EPHA7       | ICK       | MAP2K<br>2 | MAPK8        | NEK7         | PKN1        | RPS6KA<br>3 | TAOK1       |            |
| BRSK2      | CIT          | EPHB1       | IGF1R     | MAP2K<br>3 | MAPK9        | NEK9         | PKN2        | RPS6KA<br>4 | TAOK2       |            |
| BTK        | CLK1         | EPHB2       | IKBKB     | MAP2K<br>4 | MAPKAPK<br>3 | NLK          | PKN3        | RPS6KA<br>5 | TAOK3       |            |

**Supplementary Table 4. List of all protein kinases quantified in MS-based kinase-binding profiles of AZD8055 and CZ415 compounds identified from mixed human cell-line lysates. None of the kinases were inhibited by either compound with a  $pI_{C50} > 5$ .**

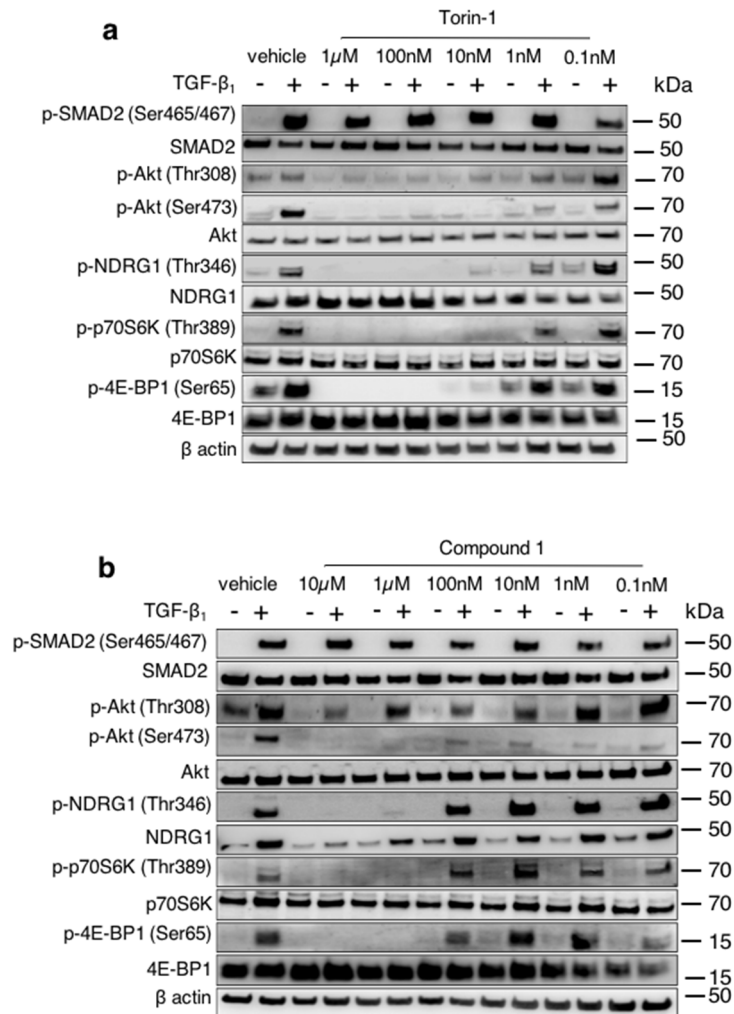

**Supplementary Figure 3. Torin-1 and Compound 1 inhibit TGF- $\beta_1$  -induced phosphorylation of mTOR substrates in control pHLFs.** pHLFs were pre-incubated with vehicle (0.1% DMSO) or increasing concentrations of Torin-1 (a) or Compound 1 (b) prior to stimulation with TGF- $\beta_1$  (1ng/ml). Cells were lysed at 1 hour to assess Smad phosphorylation or at 12 hours to assess phosphorylation of specified proteins. Data are representative of 3 replicate wells per condition.

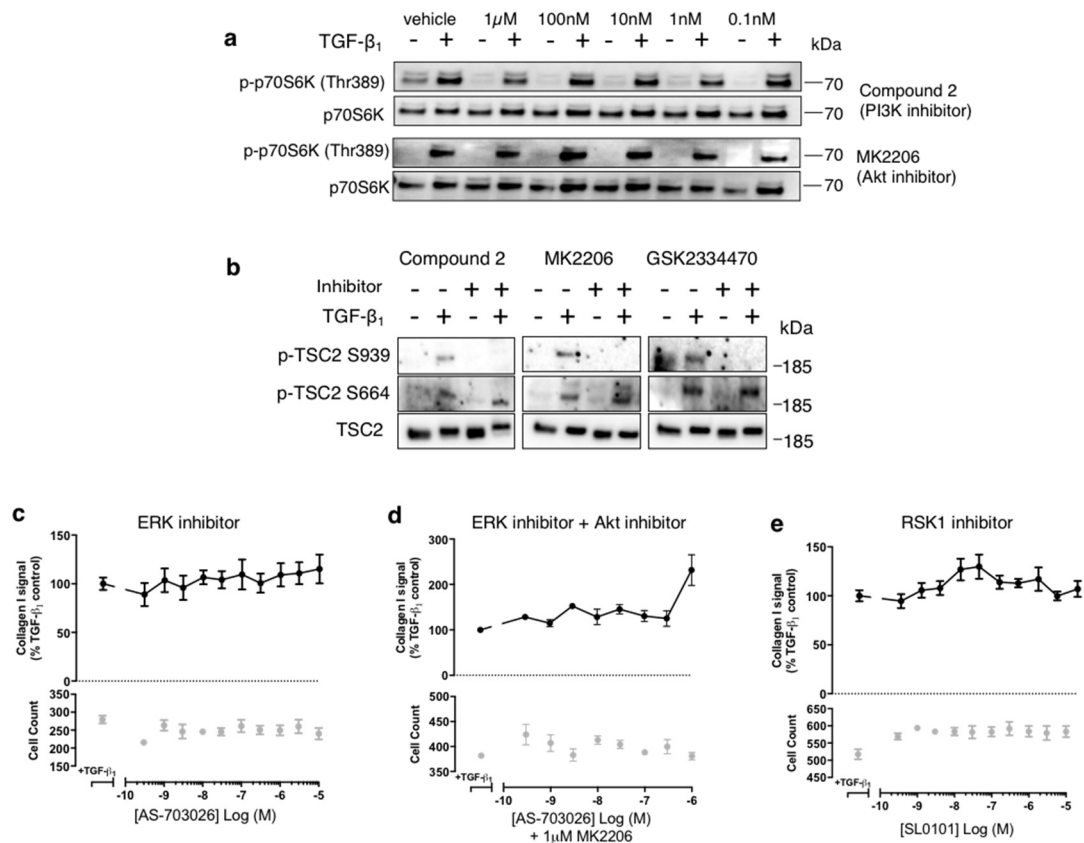

**Supplementary Figure 4. TGF- $\beta_1$  induced mTORC1 signalling and collagen response is Akt- and ERK- independent.** Control pHLFs were pre-incubated with vehicle (0.1% DMSO) or increasing concentrations of Compound 2 (PI3K inhibitor) or MK2206 (Akt inhibitor) (a) or 1 $\mu$ M Compound 2, MK2206 or GSK2334470 (PDK1 inhibitor) (b) prior to stimulation with TGF- $\beta_1$  (1ng/ml). Cells were lysed 12 hours later and the phosphorylation of specified phosphoproteins assessed by Western blot. Additionally, control pHLFs were pre-incubated with vehicle (0.1% DMSO) or increasing concentrations of AS-703026 (ERK inhibitor) alone (c) or in combination with 1 $\mu$ M MK2206 (Akt inhibitor) (d), or increasing concentrations of SL0101 (RSK1 inhibitor) (e) and stimulated with TGF- $\beta_1$  (1ng/ml) for 72 hours with collagen deposition assessed in the macromolecular crowding assay. Data are expressed as collagen I signal calculated as a percentage of the TGF- $\beta_1$ -treated control ( $n=4$  fields of view imaged per well) and cell counts obtained by staining nuclei with DAPI. Each data point shown is mean  $\pm$  SEM of 4 replicate wells per condition and is representative of 3 independent experiments.

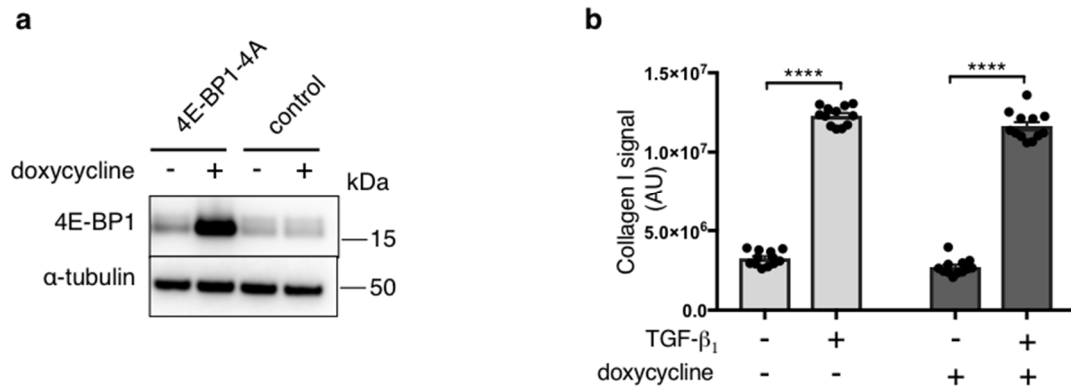

**Supplementary Figure 5. Effect of doxycycline treatment on untransduced control pHLFs.** pHLFs expressing 4E-BP1-4A dominant negative phosphomutant and untransduced pHLFs were treated with doxycycline 1 $\mu$ g/ml for 24 hours prior to cell lysis and analysis of 4E-BP1 expression using Western blot (a). Additionally, untransduced pHLFs were treated with doxycycline for 24 hours prior to TGF- $\beta_1$  stimulation for 72 hours with collagen deposition assessed by macromolecular crowding assay. Data are expressed as collagen I signal (n=4 fields of view imaged per well). Data are presented as mean  $\pm$  SEM (n=12). Differences between groups were evaluated with two-way ANOVA with Tukey multiple comparison testing. \*\*\*\*=p<0.0001.



|         | [CZ415]    |           |
|---------|------------|-----------|
|         | 10 $\mu$ M | 1 $\mu$ M |
| Donor 1 | 97.4       | 97.6      |
| Donor 2 | 91.1       | 86.7      |
| Donor 3 | 84.1       | 76.1      |
| Donor 4 | 67.4       | 63.2      |
| Donor 5 | 92.1       | 88.8      |
| Donor 6 | 81.9       | 71.6      |

|          |      |      |
|----------|------|------|
| Average  | 85.6 | 80.7 |
| SD       | 10.6 | 12.6 |
| 95% CI   | 8.5  | 10.1 |
| <i>n</i> | 6    | 6    |

**Supplementary Table 5. Summary statistics of P1NP inhibition in precision-cut lung slices in response to incubation with CZ415.** Data presented are average percent inhibition of P1NP levels (ng/ml) relative to the vehicle control within each donor. Summary statistics (mean, standard deviation, 95% confidence interval and number of donors) are provided.

## Supplementary References

1. Bantscheff, M. *et al.* Quantitative chemical proteomics reveals mechanisms of action of clinical ABL kinase inhibitors. *Nat. Biotechnol.* **25**, 1035–1044 (2007).
2. Werner, T. *et al.* High-Resolution Enabled TMT 8-plexing. *Anal. Chem.* **84**, 7188–7194 (2012).
3. Savitski, M. M. *et al.* Multiplexed Proteome Dynamics Profiling Reveals Mechanisms Controlling Protein Homeostasis. *Cell* **173**, 260–274.e25 (2018).
4. Werner, T. *et al.* Ion Coalescence of Neutron Encoded TMT 10-Plex Reporter Ions. *Anal. Chem.* **86**, 3594–3601 (2014).
5. Vizcaíno, J. A. *et al.* 2016 update of the PRIDE database and its related tools. *Nucleic Acids Res.* **44**, D447–D456 (2016).
6. Savitski, M. M. *et al.* Measuring and Managing Ratio Compression for Accurate iTRAQ/TMT Quantification. *J. Proteome Res.* **12**, 3586–3598 (2013).
7. Savitski, M. M. *et al.* Delayed Fragmentation and Optimized Isolation Width Settings for Improvement of Protein Identification and Accuracy of Isobaric Mass Tag Quantification on Orbitrap-Type Mass Spectrometers. *Anal. Chem.* **83**, 8959–8967 (2011).
8. Cox, J. & Mann, M. MaxQuant enables high peptide identification rates, individualized p.p.b.-range mass accuracies and proteome-wide protein quantification. *Nat. Biotechnol.* **26**, 1367–1372 (2008).
9. Benjamini, Y. & Hochberg, Y. Controlling the False Discovery Rate: A Practical and Powerful Approach to Multiple Testing. *Journal of the Royal Statistical Society. Series B (Methodological)* **57**, 289–300 (1995).
10. Cansfield, A. D. *et al.* CZ415, a Highly Selective mTOR Inhibitor Showing in Vivo Efficacy in a Collagen Induced Arthritis Model. *ACS Med. Chem. Lett.* **7**, 768–73 (2016).
11. Thoreen, C. C. *et al.* An ATP-competitive mammalian target of rapamycin inhibitor reveals rapamycin-resistant functions of mTORC1. *J. Biol. Chem.* **284**, 8023–32 (2009).
12. Pike, K. G. *et al.* Optimization of potent and selective dual mTORC1 and mTORC2 inhibitors: the discovery of AZD8055 and AZD2014. *Bioorg. Med. Chem. Lett.* **23**, 1212–6 (2013).
13. Kaplan, J. *et al.* Discovery of 3,6-dihydro-2H-pyran as a morpholine replacement in 6-aryl-1H-pyrazolo[3,4-d]pyrimidines and 2-arylthieno[3,2-d]pyrimidines: ATP-competitive inhibitors of the mammalian target of rapamycin (mTOR). *Bioorg. Med. Chem. Lett.* **20**, 640–3 (2010).
14. Staben, S. T. *et al.* Structure-based optimization of pyrazolo-pyrimidine and -pyridine inhibitors of PI3-kinase. *Bioorg. Med. Chem. Lett.* **20**, 6048–51 (2010).
15. Yap, T. A. *et al.* First-in-Man Clinical Trial of the Oral Pan-AKT Inhibitor MK-2206 in Patients With Advanced Solid Tumors. *J. Clin. Oncol.* **29**, 4688–4695 (2011).
16. Medina, J. R. *et al.* Structure-based design of potent and selective 3-phosphoinositide-dependent kinase-1 (PDK1) inhibitors. *J. Med. Chem.* **54**, 1871–95 (2011).
17. Yung-Chi, C. & Prusoff, W. H. Relationship between the inhibition constant (KI) and the concentration of inhibitor which causes 50 per cent inhibition (I50) of an enzymatic reaction. *Biochem. Pharmacol.* **22**, 3099–3108 (1973).

**Supplementary Figure 6: Figure 1a uncropped western blots (TGF- $\beta$ 1 time course)**

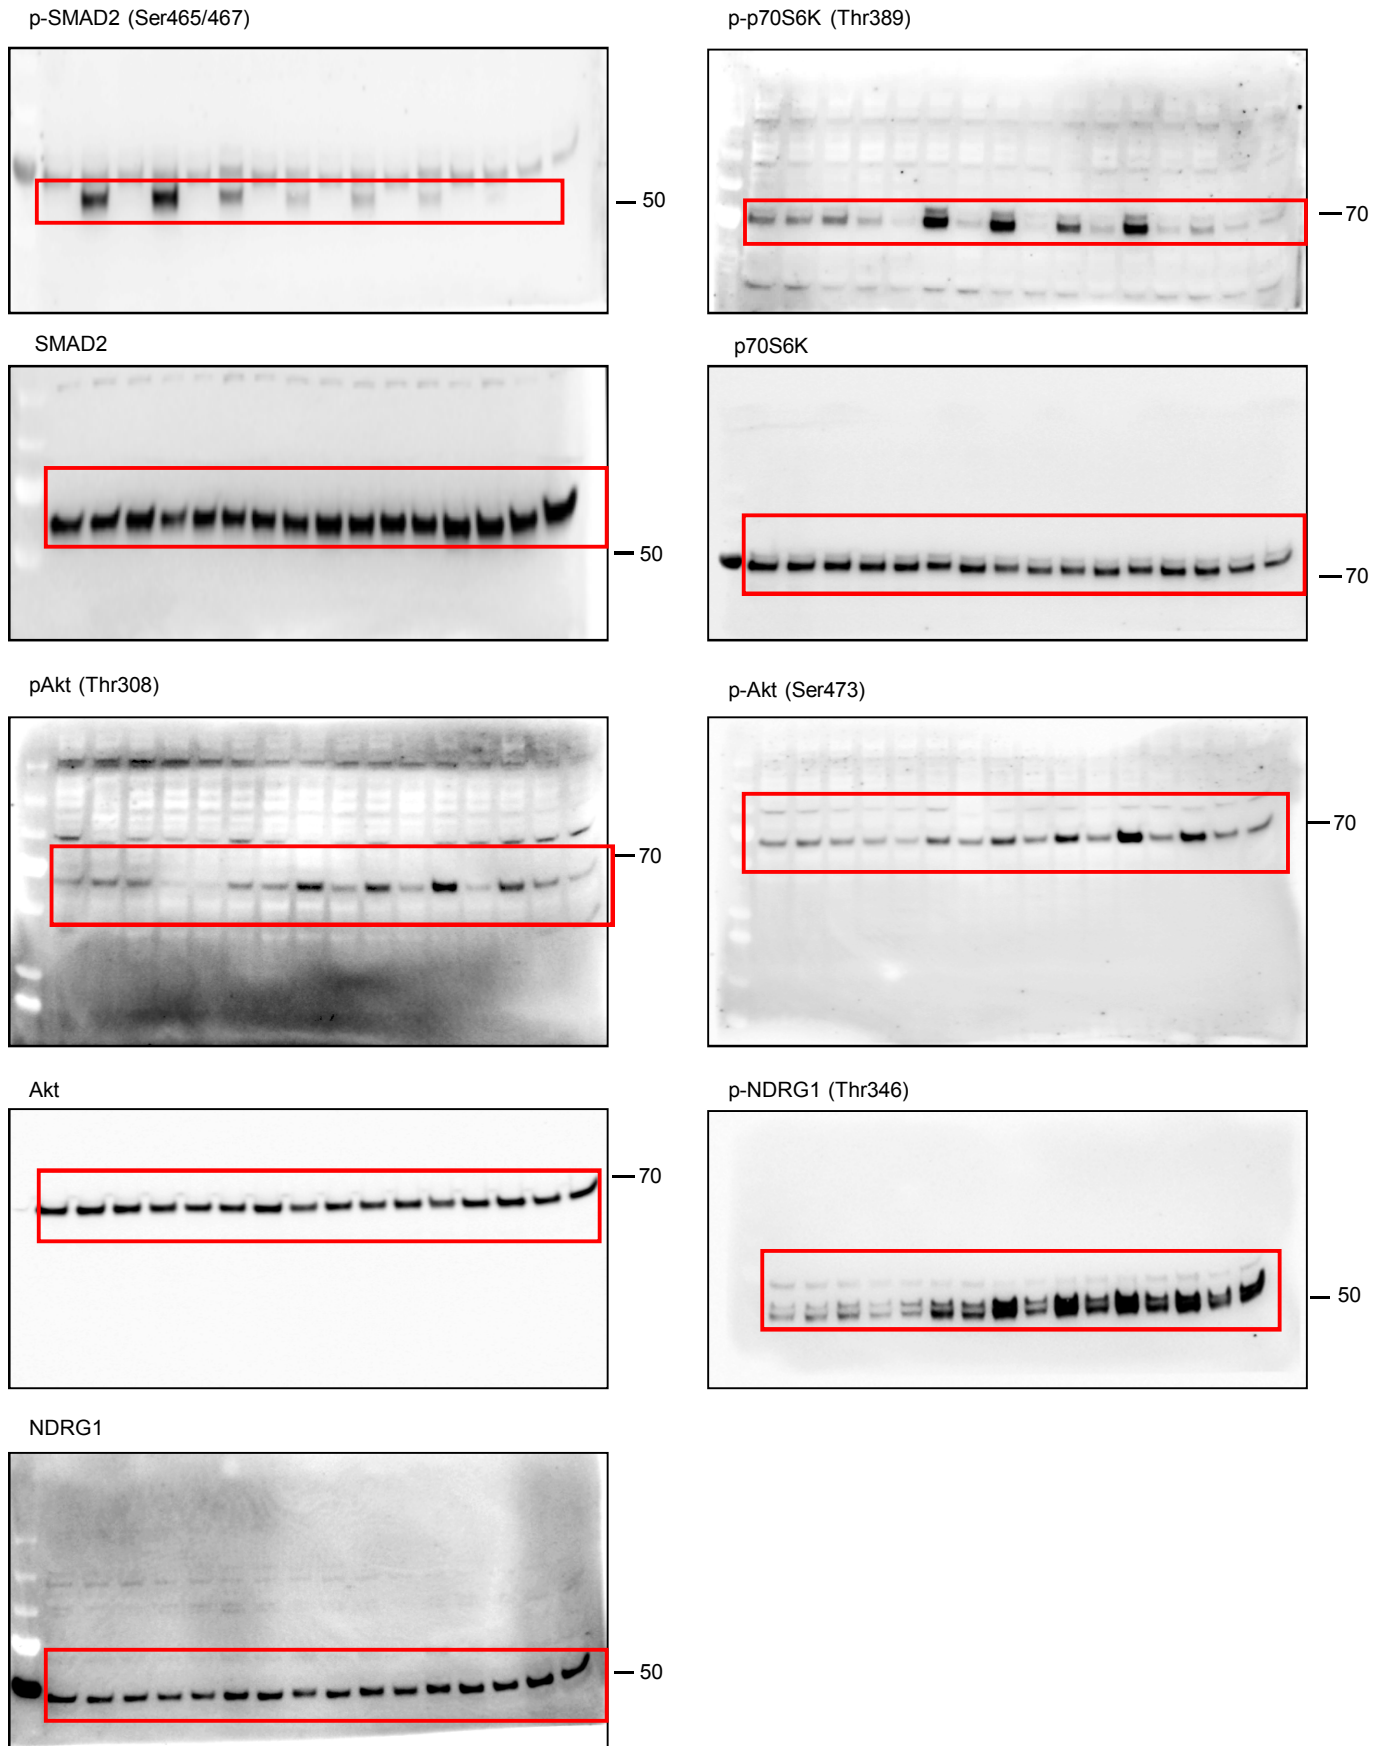

**Supplementary Figure 6: Figure 1a uncropped western blots (continued)**

p-4E-BP1 (Ser65)

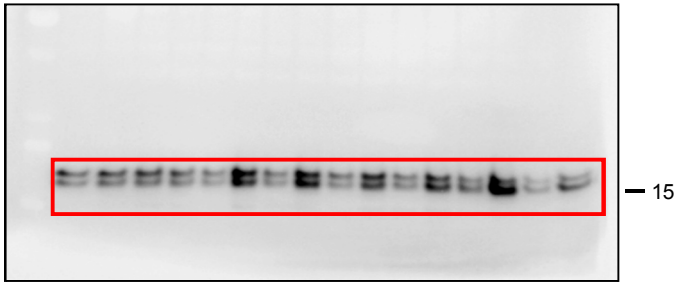

$\beta$  actin

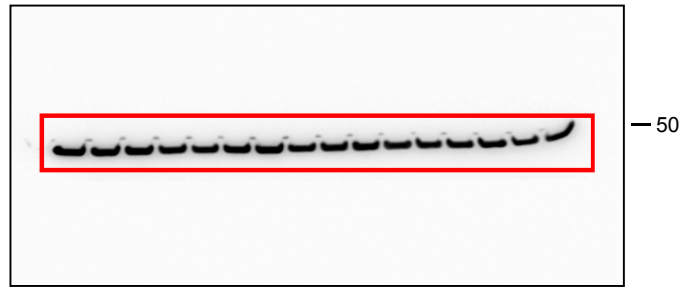

4E-BP1

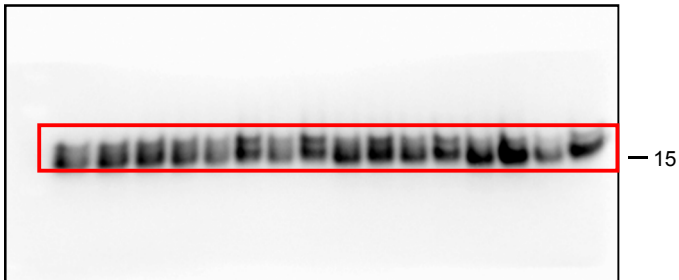

**Supplementary Figure 7: Figure 2b uncropped western blots (Compound 2 (PI3K inhibitor))**

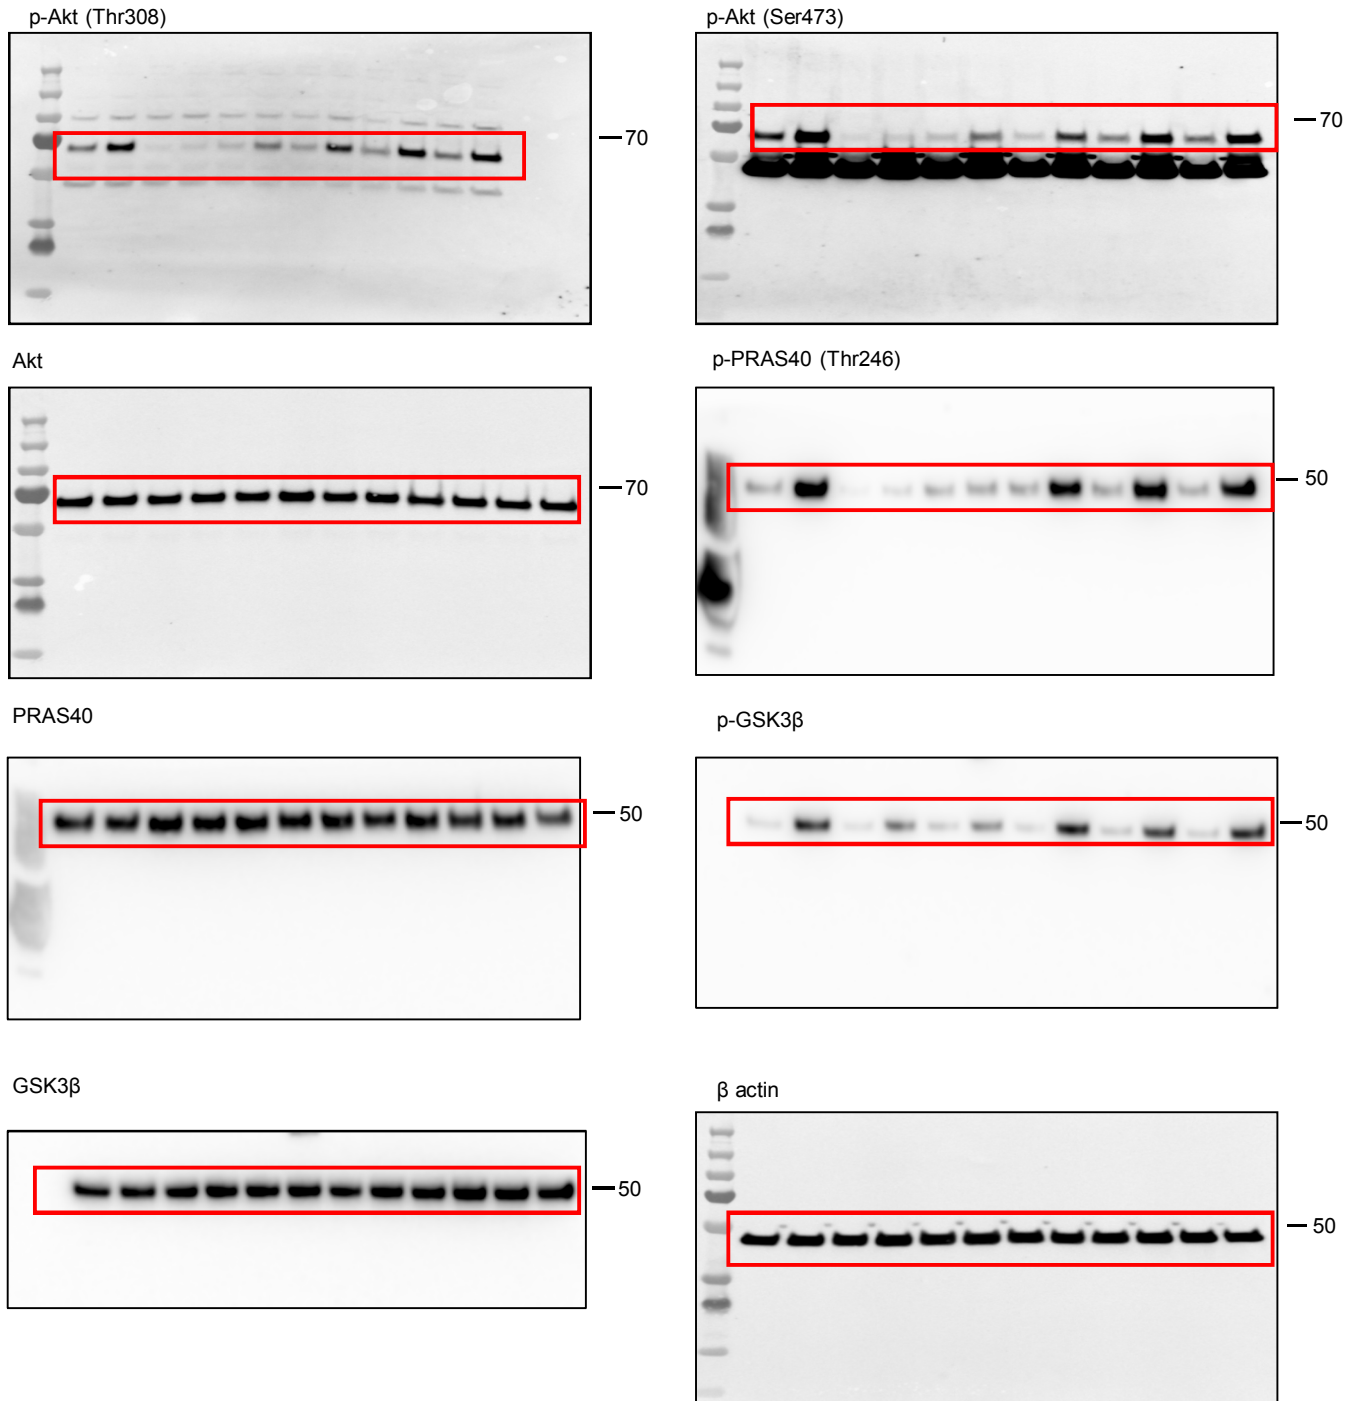

Supplementary Figure 7: Figure 2d uncropped western blots (MK2206 (Akt inhibitor))

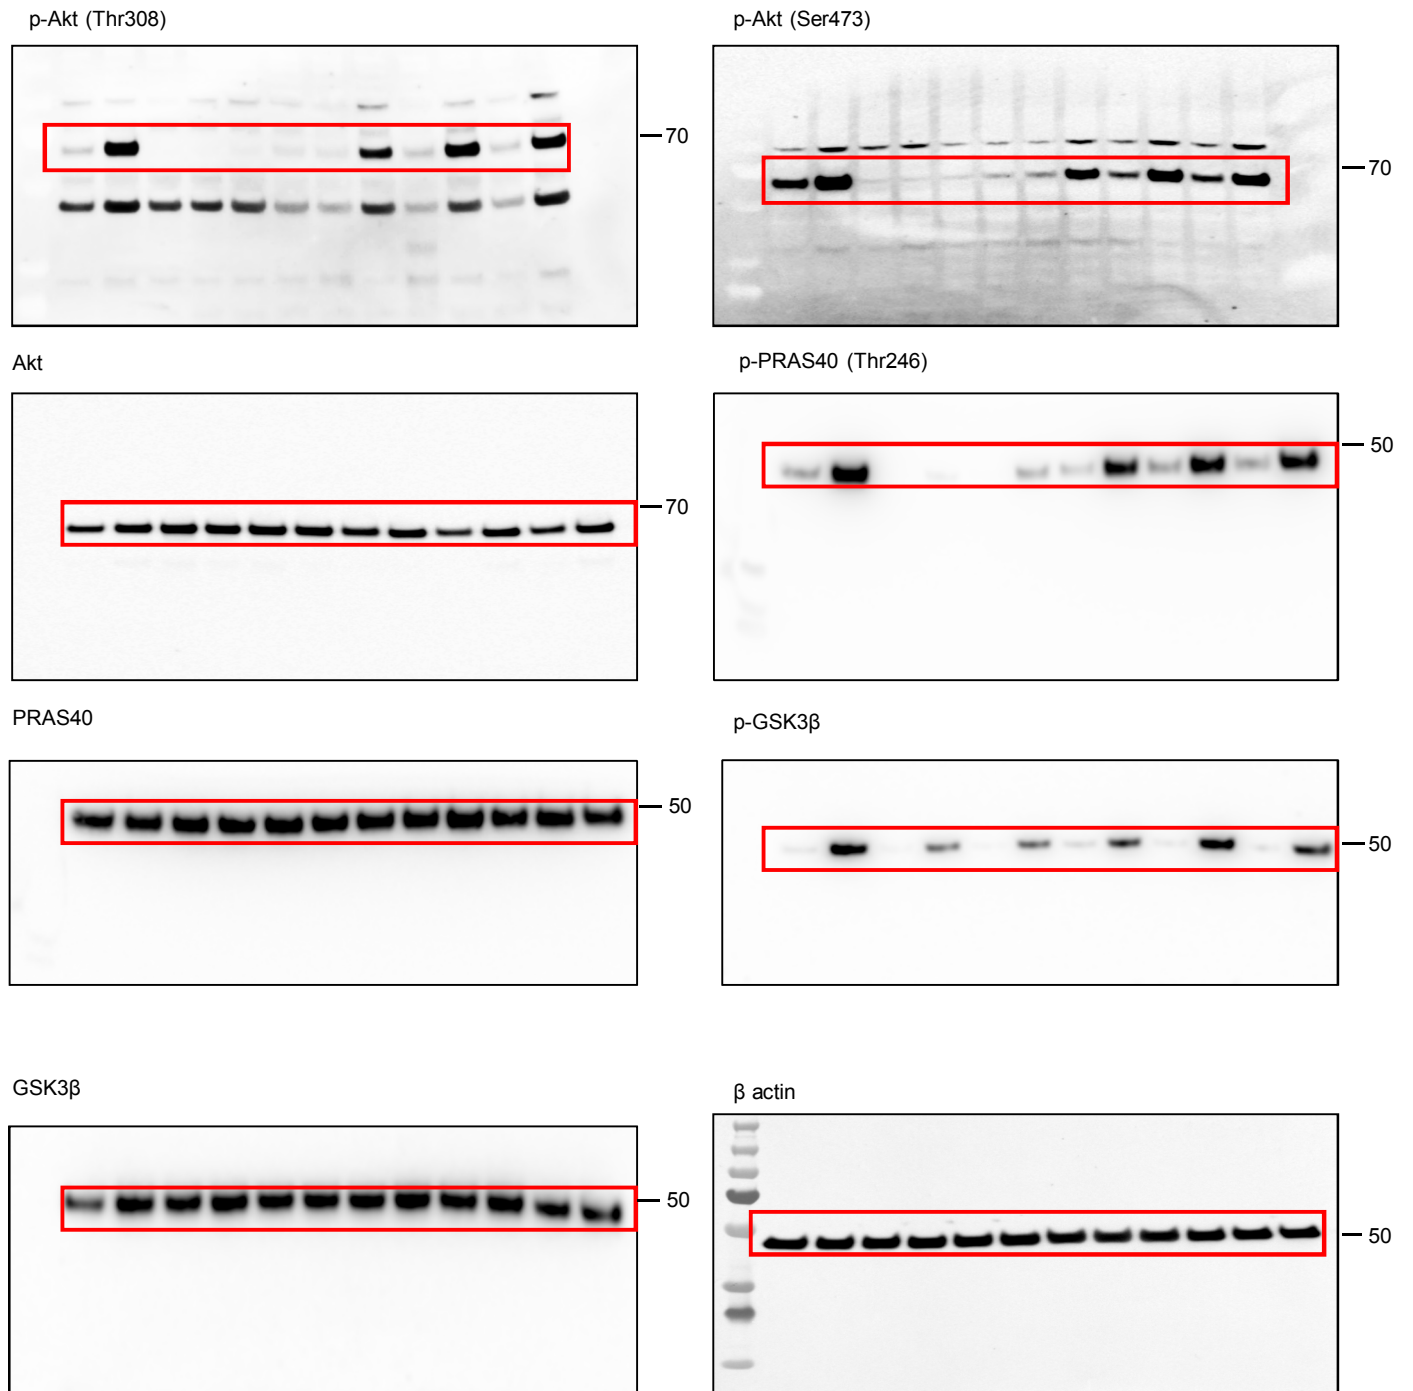

**Supplementary Figure 7: Figure 2f uncropped western blots (GSK2334470 (PDK1 inhibitor))**

p-Akt (Thr308)

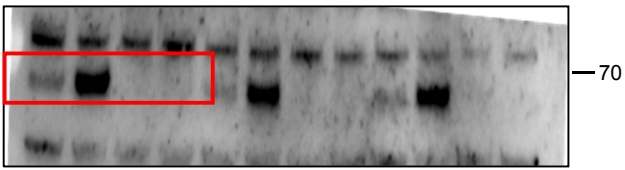

p-Akt (Ser473)

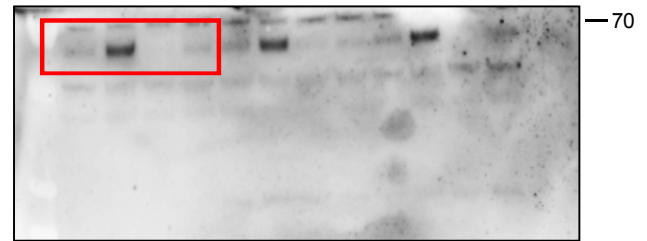

Akt

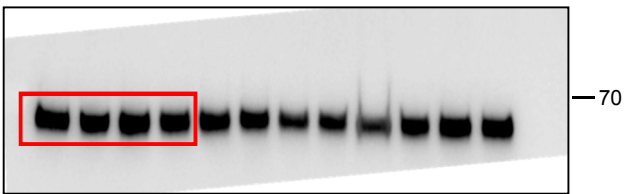

p-NDRG1 (Thr346)

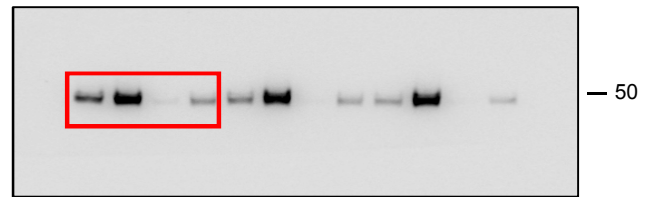

NDRG1

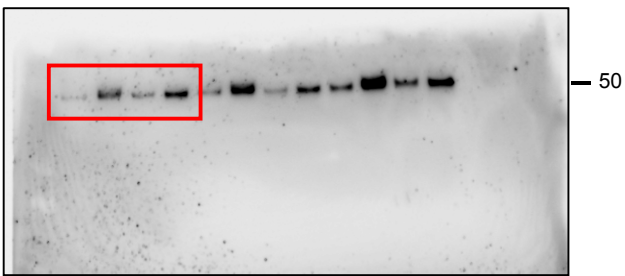

p-PRAS40 (Thr246)

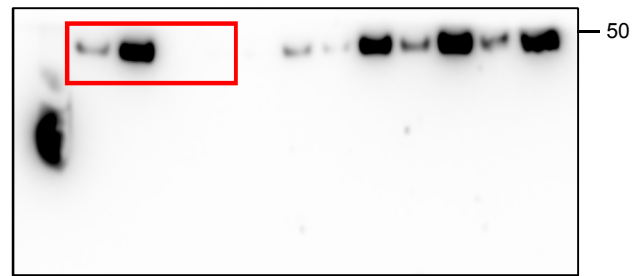

PRAS40

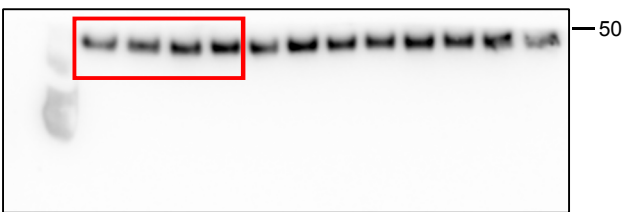

p-GSK3 $\beta$

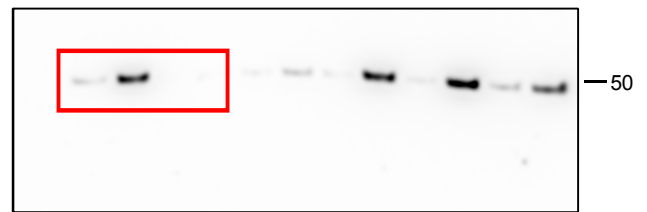

GSK3 $\beta$

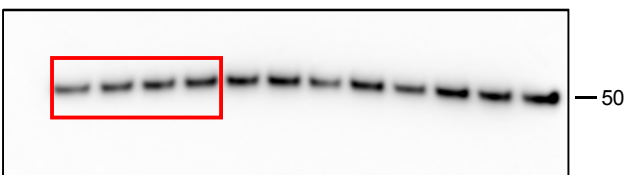

$\beta$  actin

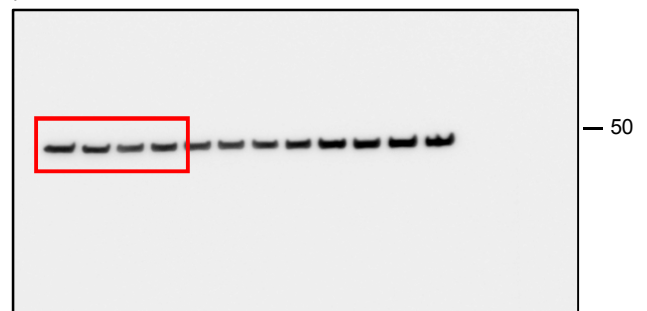

Supplementary Figure 8: Figure 3a uncropped western blots (AZD8055)

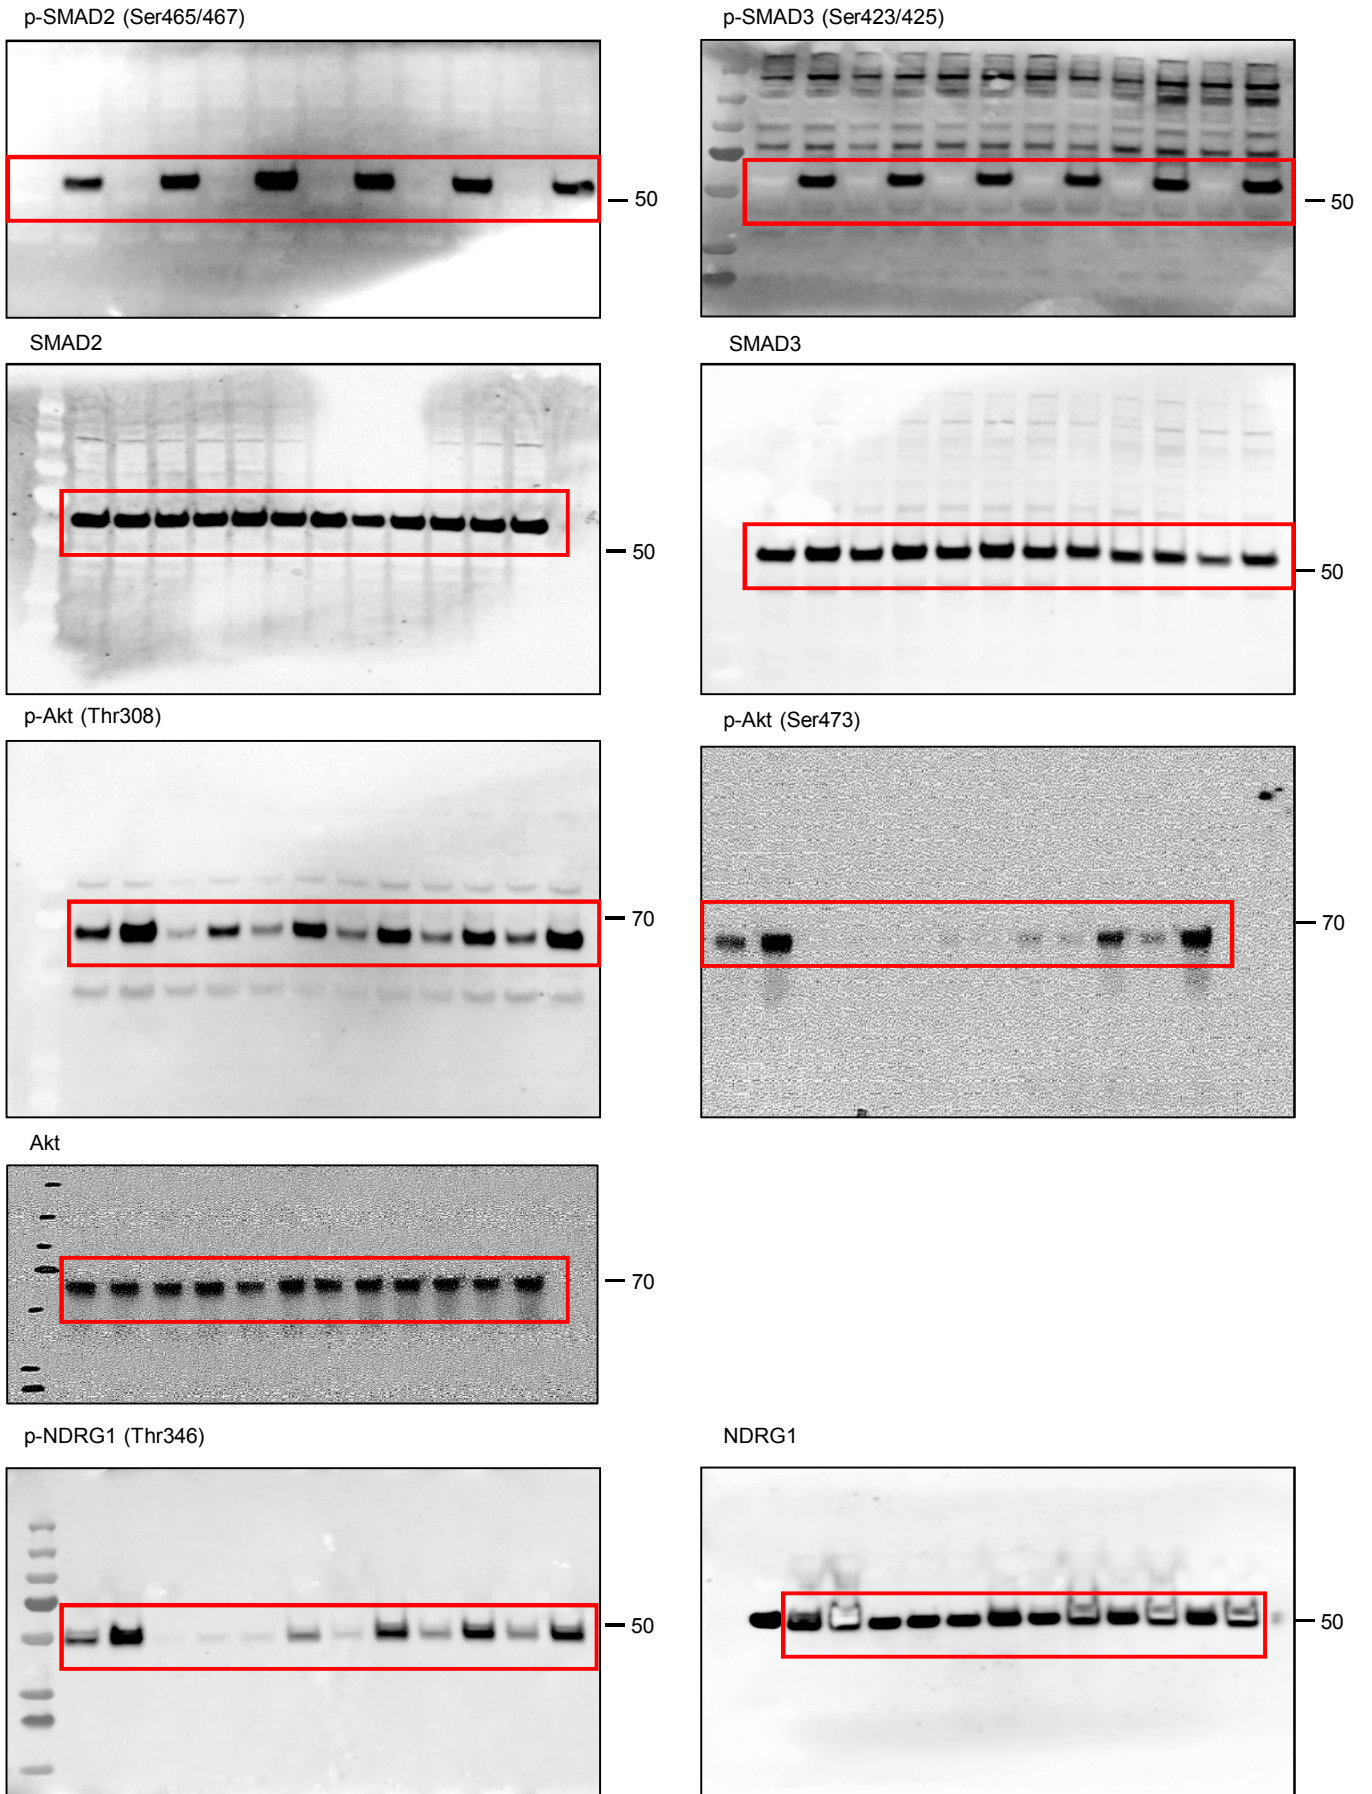



**Supplementary Figure 8: Figure 3a uncropped western blots (continued)**

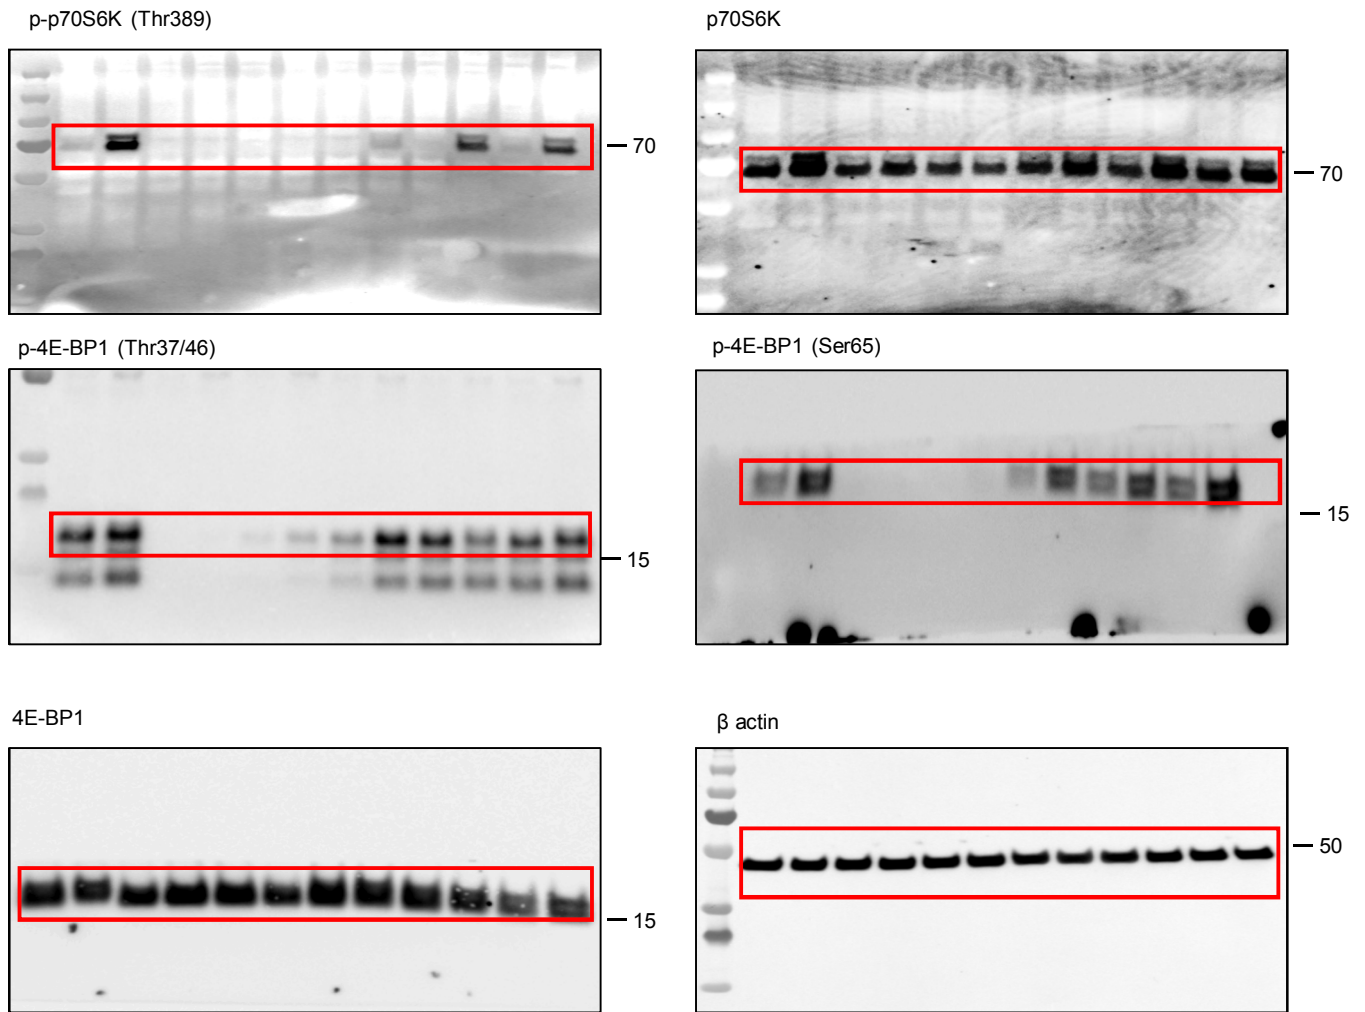

**Supplementary Figure 9: Figure 4a uncropped western blots**

SMAD3

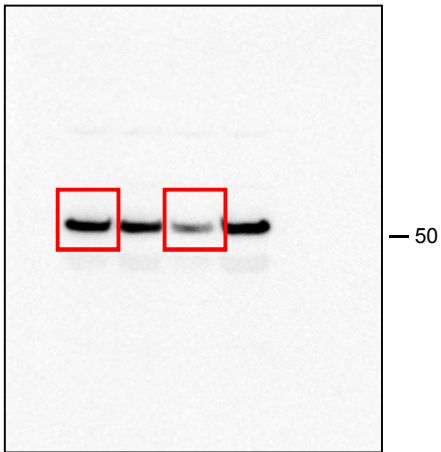

$\beta$  actin

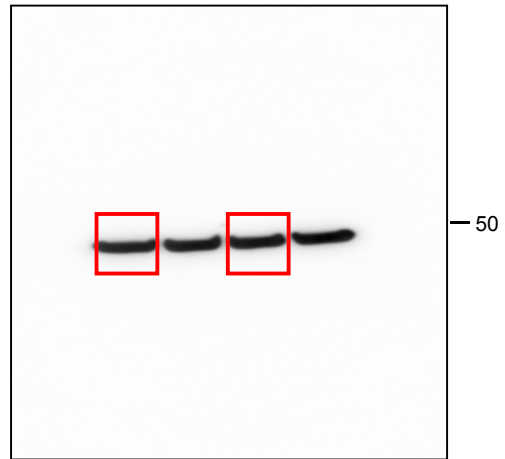

**Supplementary Figure 9: Figure 4b uncropped western blots**

p-p70S6K (Thr389)

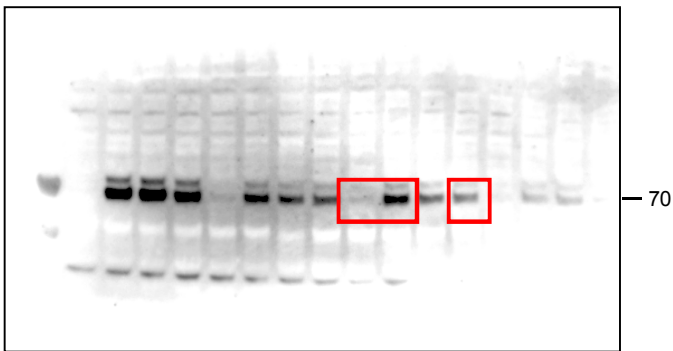

p70S6K

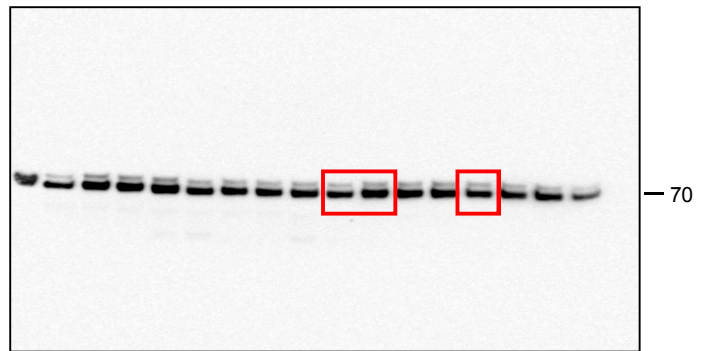

p-4E-BP1 (Ser65)

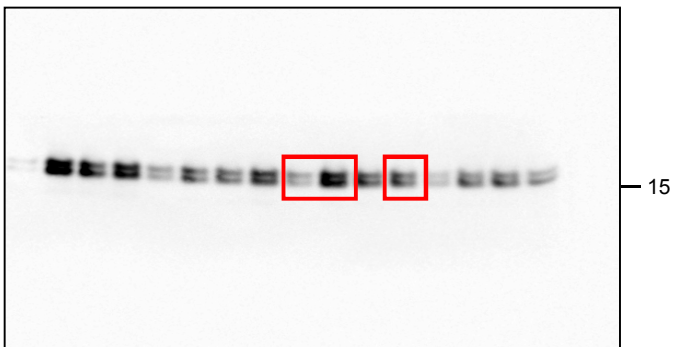

4E-BP1

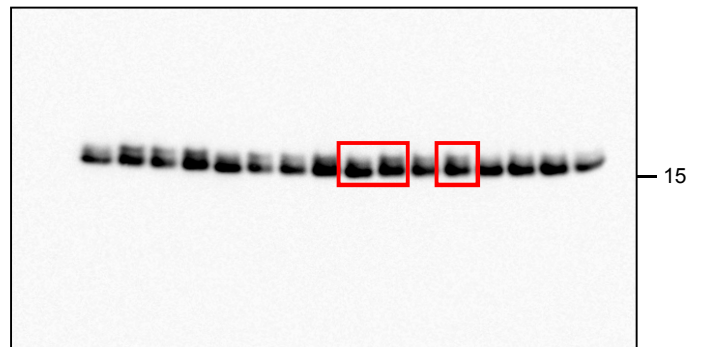

**Supplementary Figure 10: Figure 5c uncropped western blots (rapamycin)**

p-Akt (Ser473)

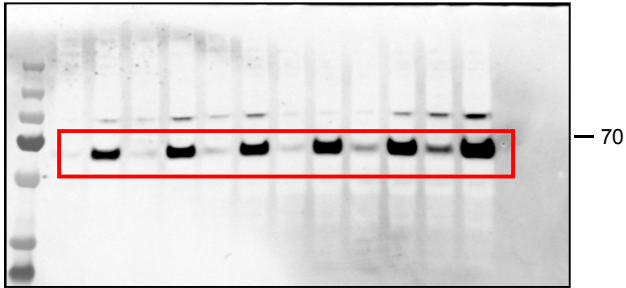

p-NDRG1 (Thr346)

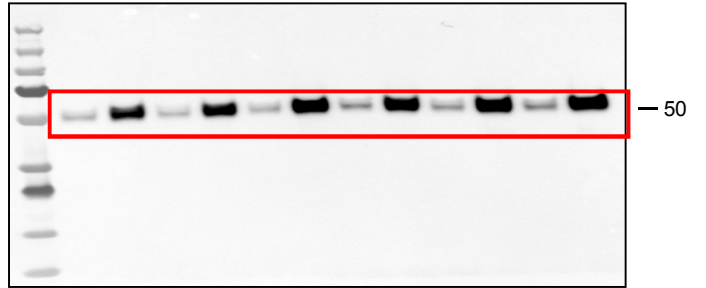

Akt

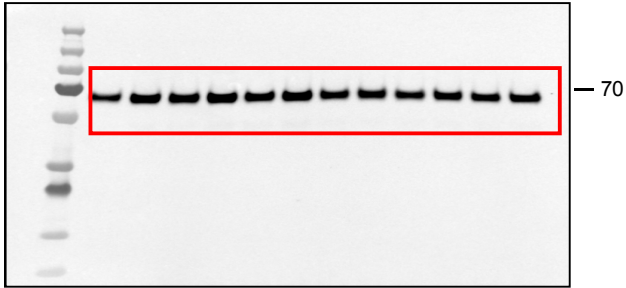

NDRG1

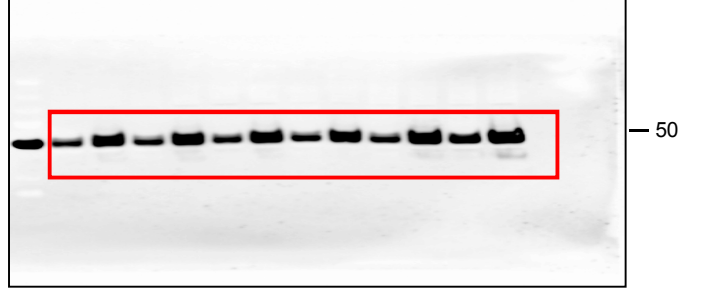

p-p70S6K (Thr389)

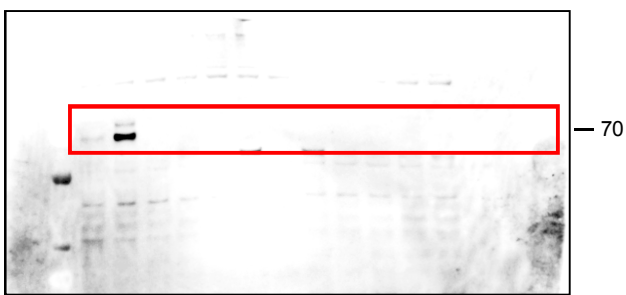

p70S6K

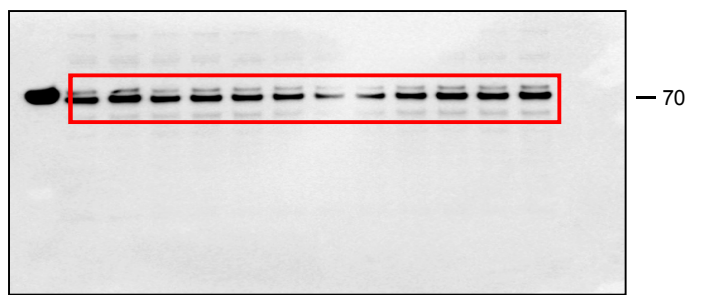

p-4E-BP1 (Thr37/46)

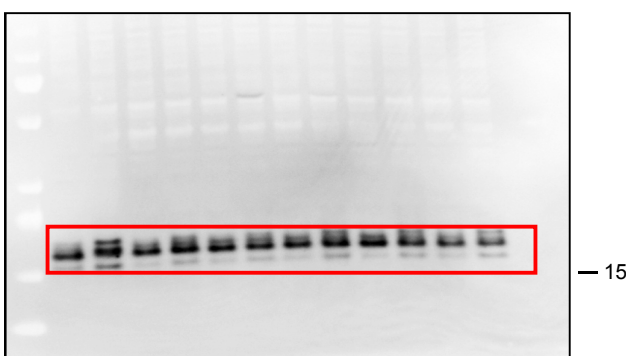

p-4E-BP1 (Ser65)

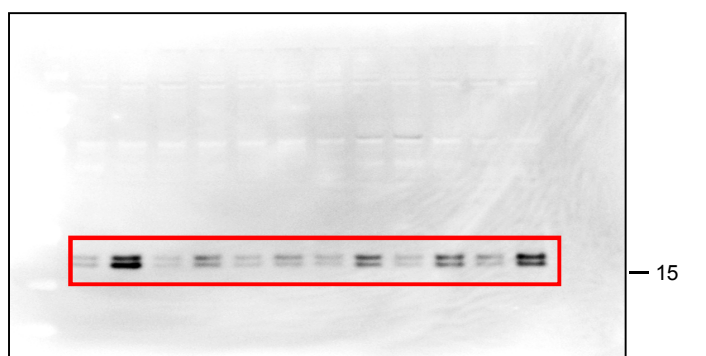

4E-BP1

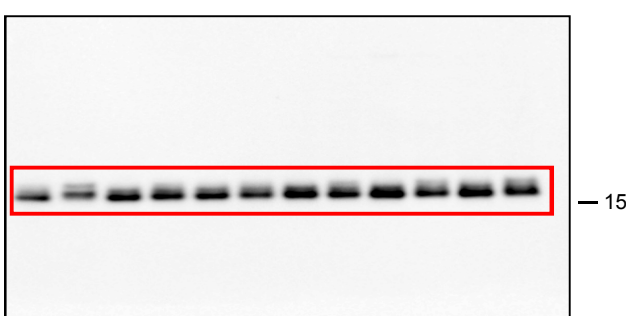

$\beta$  actin

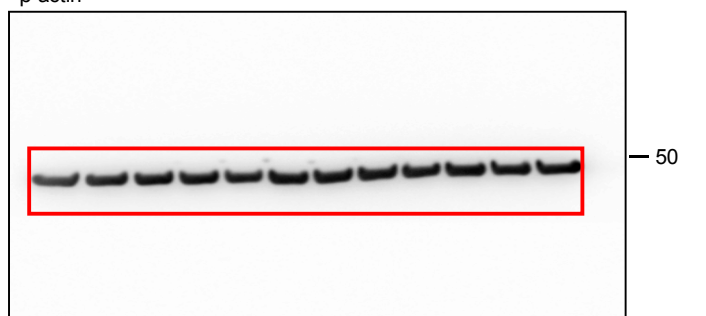

**Supplementary Figure 10: Figure 5d uncropped western blots (LY2584702)**

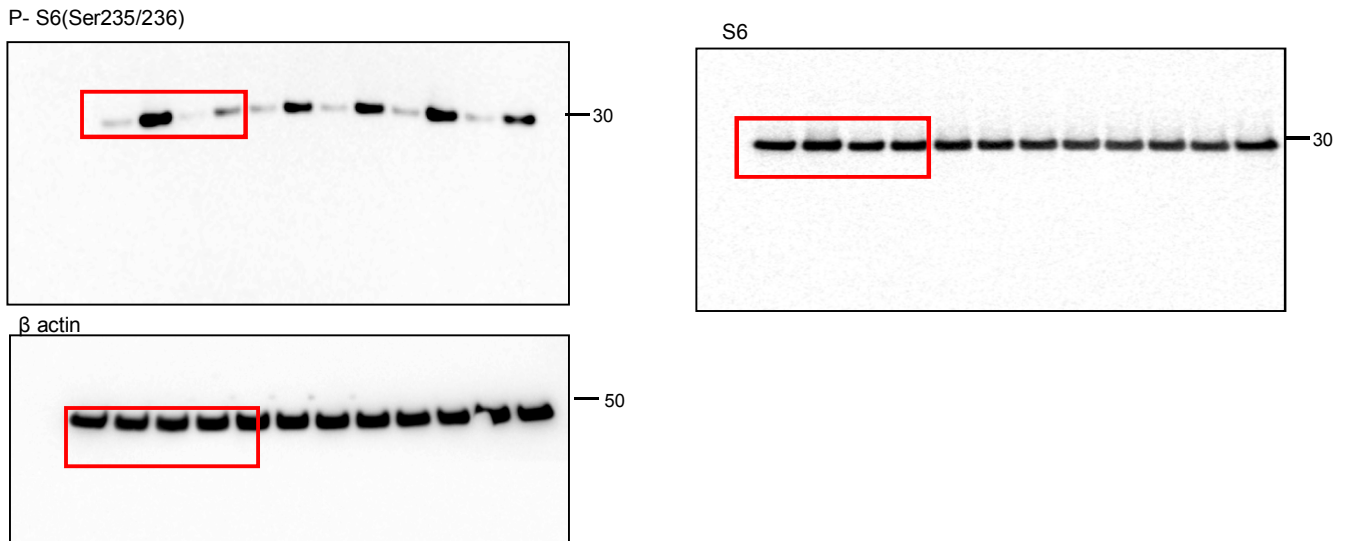

**Supplementary Figure 10: Figure 5f uncropped western blots (GSK2334470)**

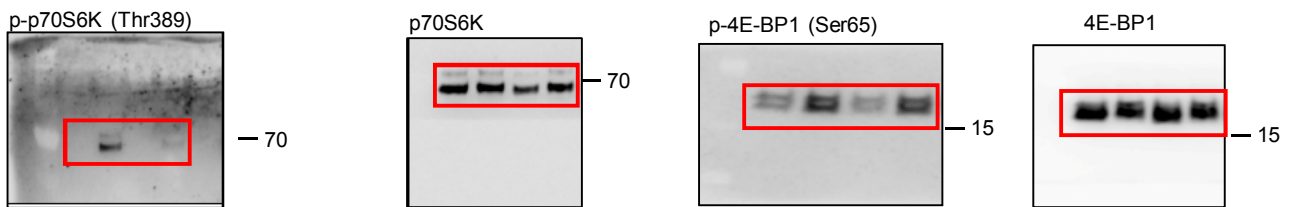

**Supplementary Figure 10: Figure 5g uncropped western blots (cap pull down)**

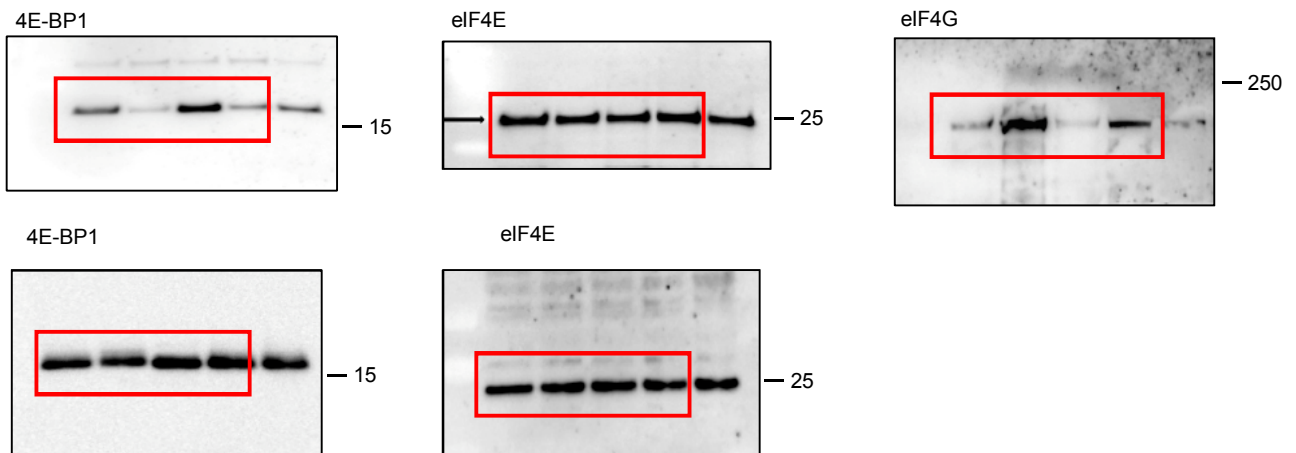

**Supplementary Figure 11: Figure 6a uncropped western blots (4E-BP1 siRNA pHLFs)**

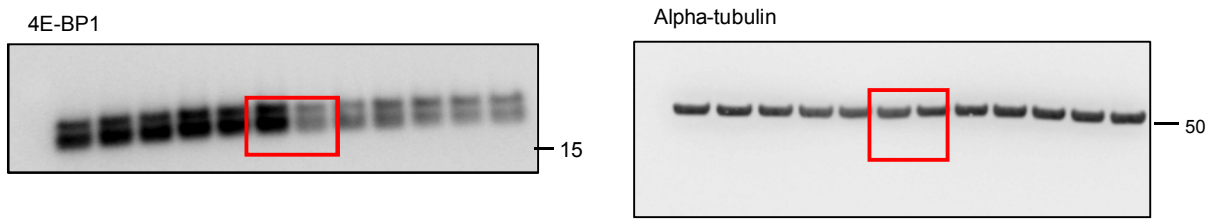

**Supplementary Figure 11: Figure 6c uncropped western blots (cap pull down phosphomutant) - immunoprecipitation**

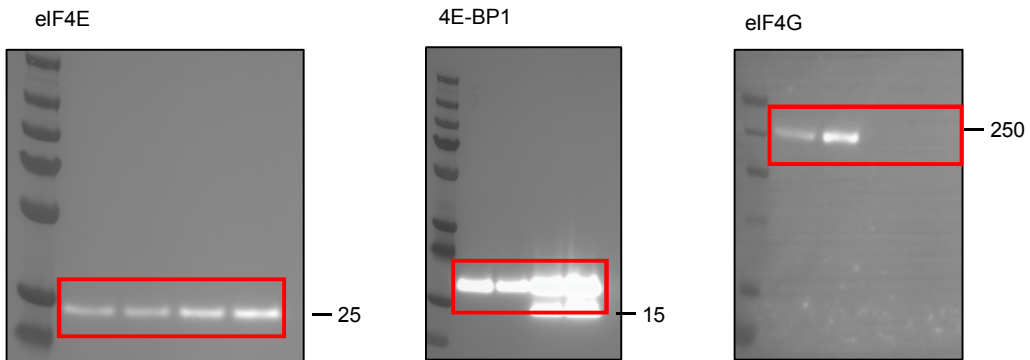

**Supplementary Figure 11: Figure 6c uncropped western blots (cap pull down phosphomutant) - Lysate**

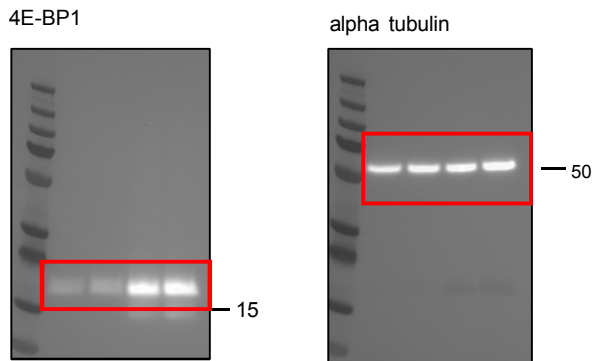

**Supplementary Figure 12: Figure 9a uncropped western blots (CAF CRISPR)**

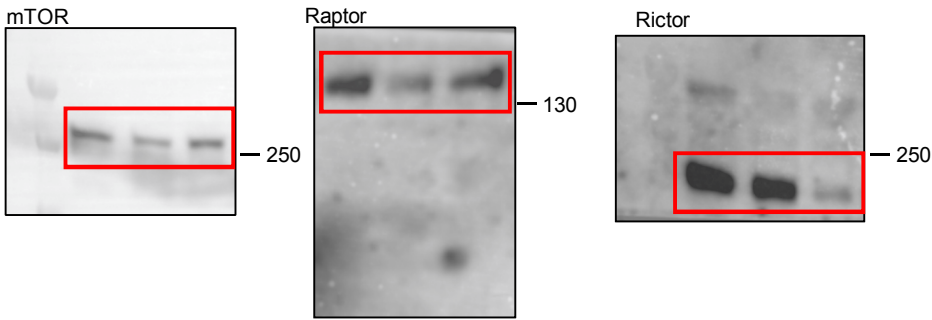

**Supplementary Figure 12: Figure 9c uncropped western blots (CAF siRNA)**

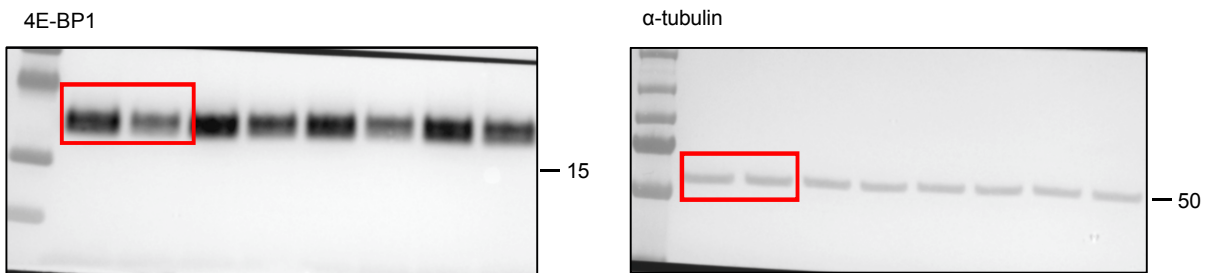

**Supplementary Figure 12: Figure 9e uncropped western blots (HDF CRISPR)**

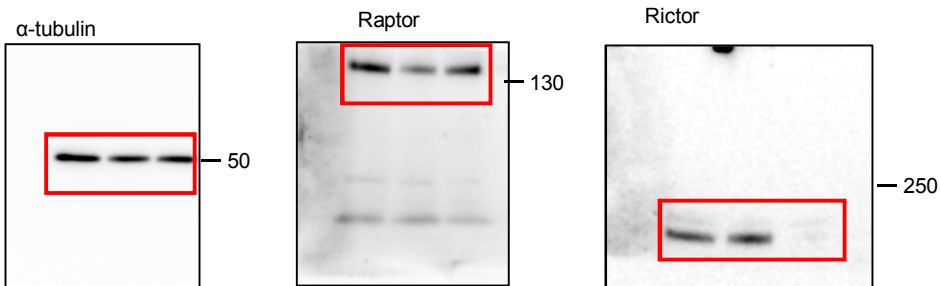

**Supplementary Figure 12: Figure 9g uncropped western blots (HDF siRNA)**

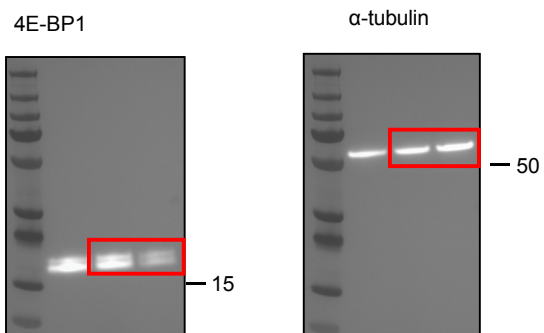

**Supplementary Figure 12: Figure 9i uncropped western blots (HSC CRISPR)**

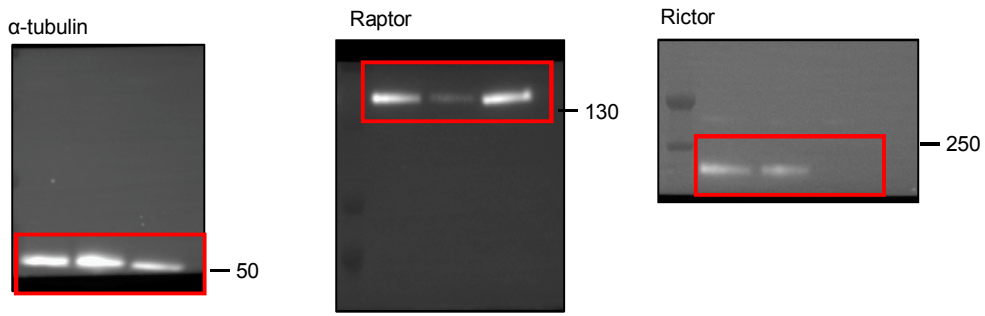

**Supplementary Figure 12: Figure 9k uncropped western blots (HSC siRNA)**

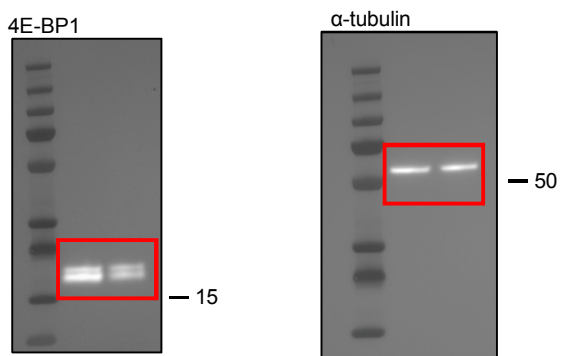

**Supplementary Figure 13: Supplementary Figure 3a uncropped western blots (Torin-1)**

p-SMAD2 (Ser465/467)

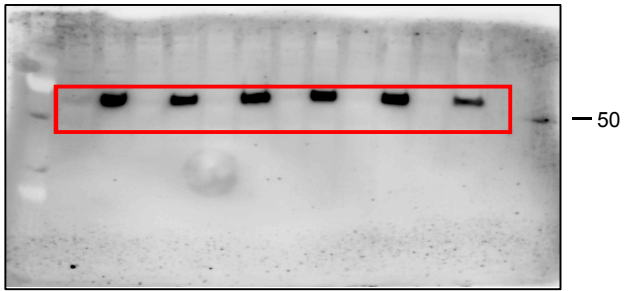

SMAD2

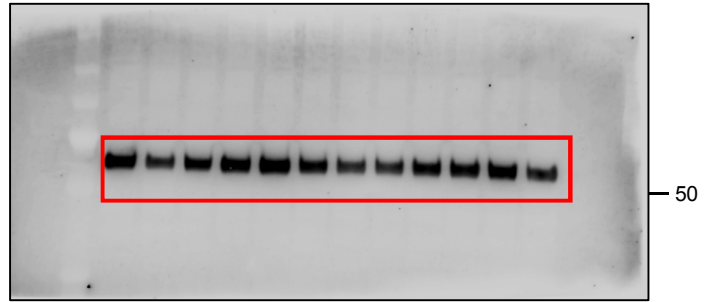

p-Akt (Thr308)

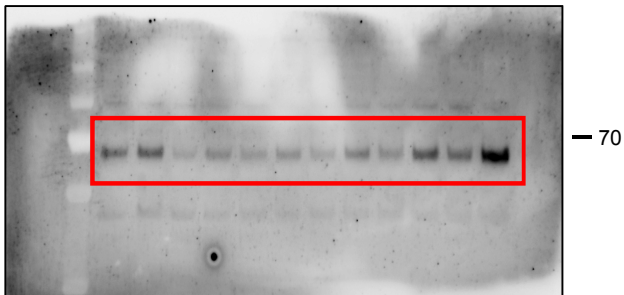

p-Akt (Ser473)

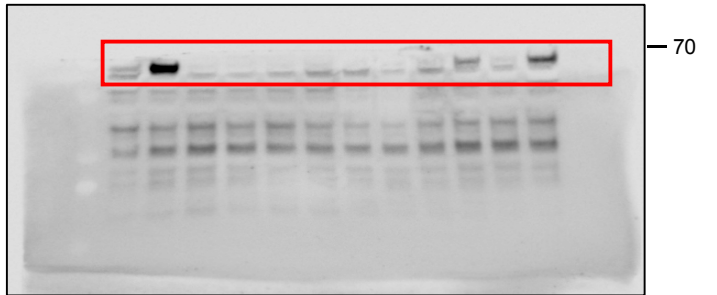

Akt

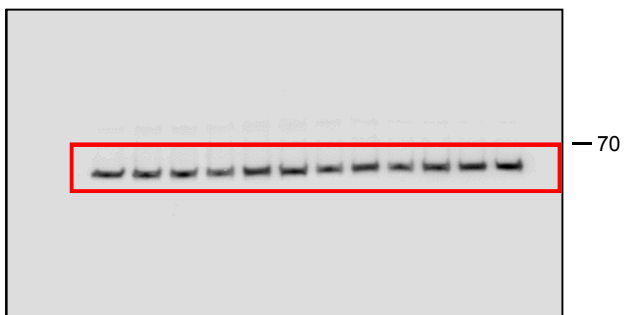

p-NDRG1 (Thr246)

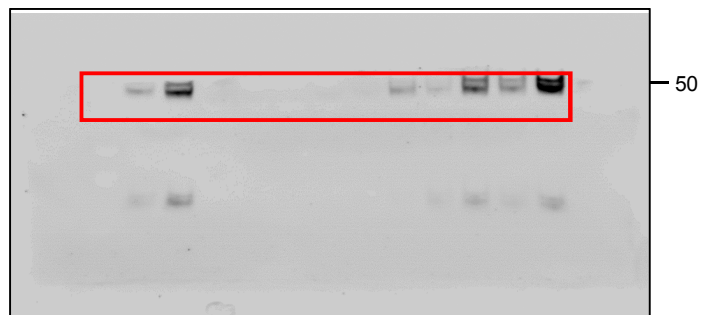

NDRG1

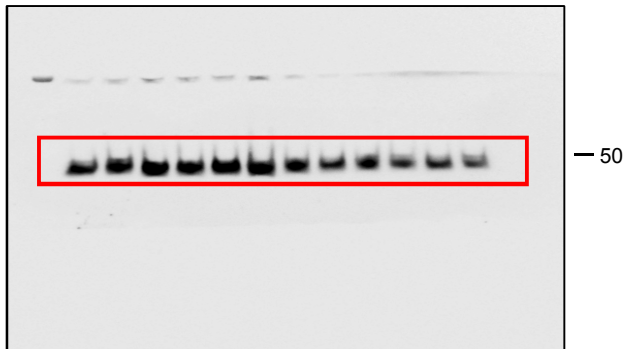

p-p70S6K (Thr389)

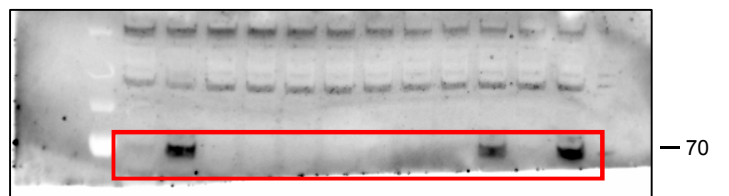

p70S6K

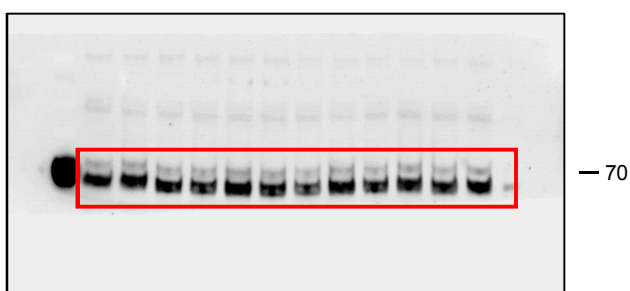

p-4E-BP1 (Ser65)

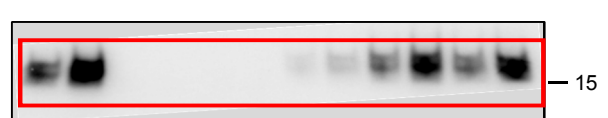



**Supplementary Figure 13: Supplementary Figure 3a uncropped western blots (Torin-1) (Continued)**

4E-BP1

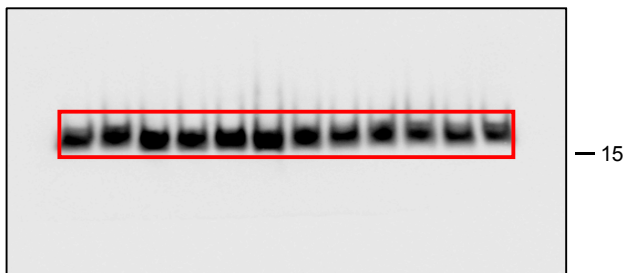

$\beta$  actin

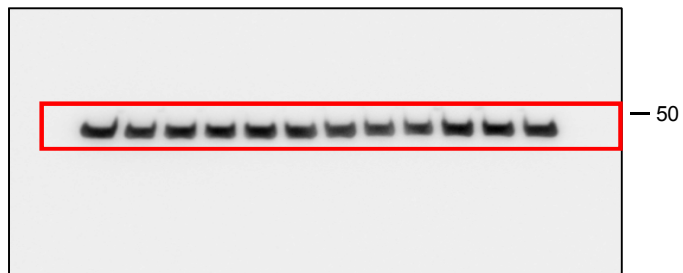

**Supplementary Figure 13: Supplementary Figure 3b uncropped western blots (Compound 1)**

p-SMAD2 (Ser465/467)

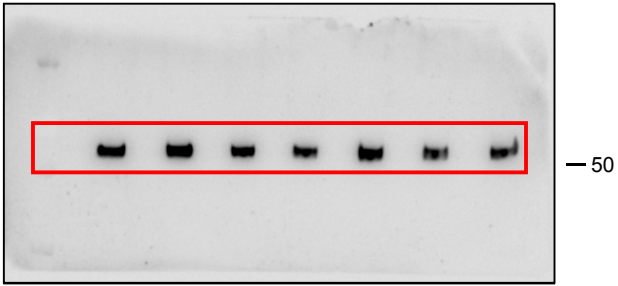

SMAD2

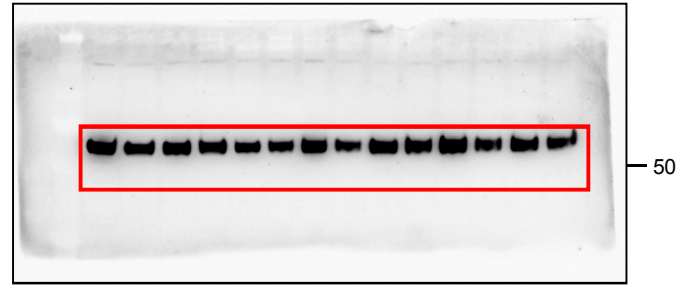

p-Akt (Thr308)

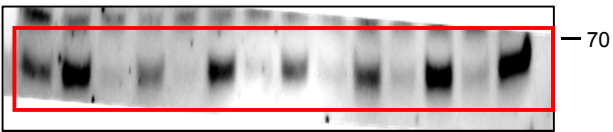

p-Akt (Ser473)

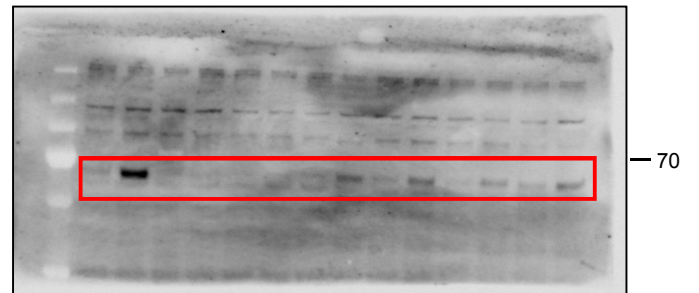

Akt

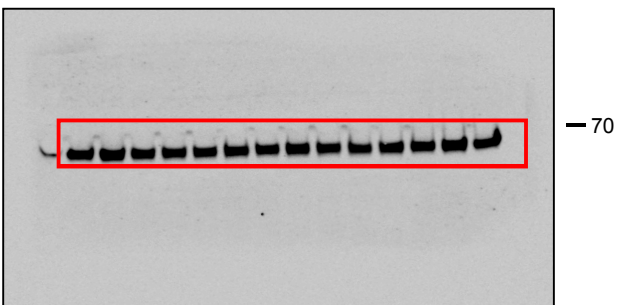

p-NDRG1 (Thr246)

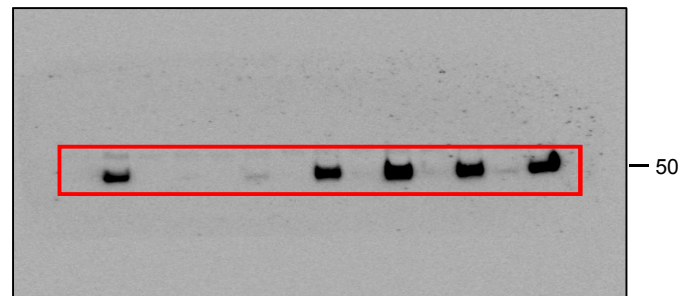

NDRG1

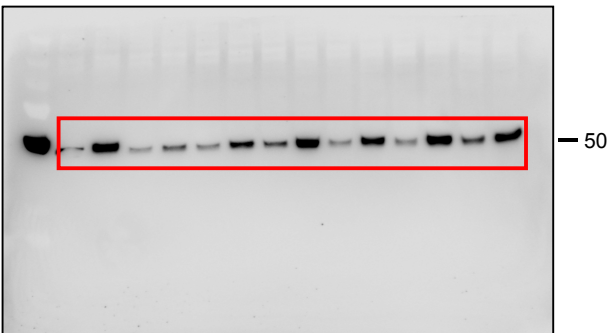

p-p70S6K (Thr389)

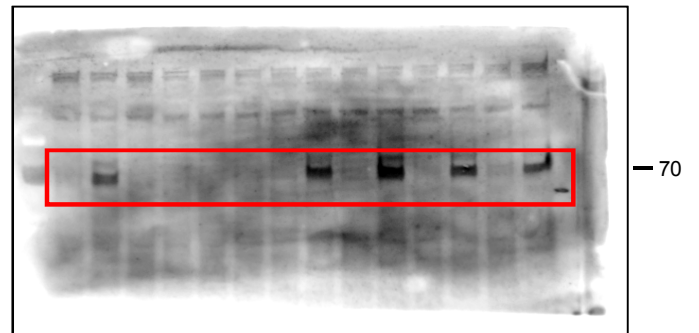

p70S6K

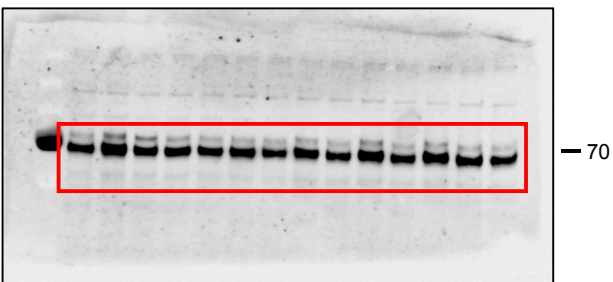

p-4E-BP1 (Ser65)

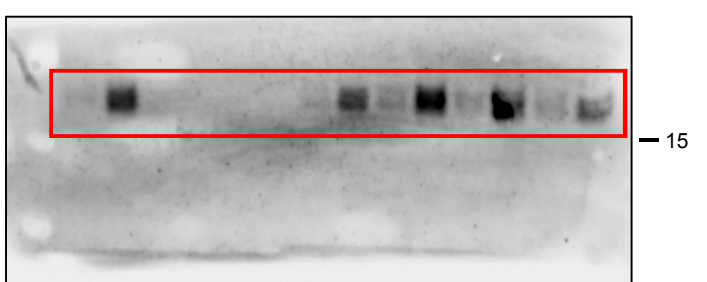

**Supplementary Figure 13: Supplementary Figure 3b uncropped western blots (Compound 1) (Continued)**

4E-BP1

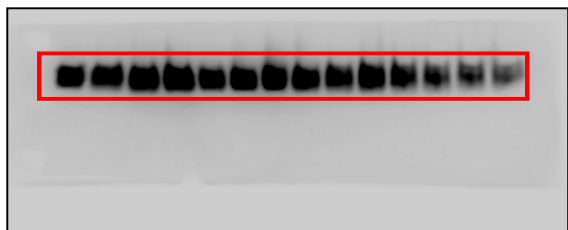

— 15

$\beta$  actin

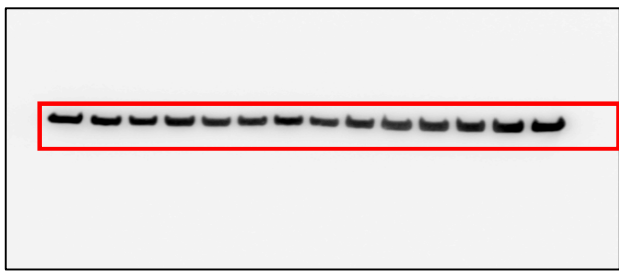

— 50

**Supplementary Figure 14: Supplementary Figure 4a uncropped western blots**

p-p70S6K (Thr389) (PI3K inhibitor)

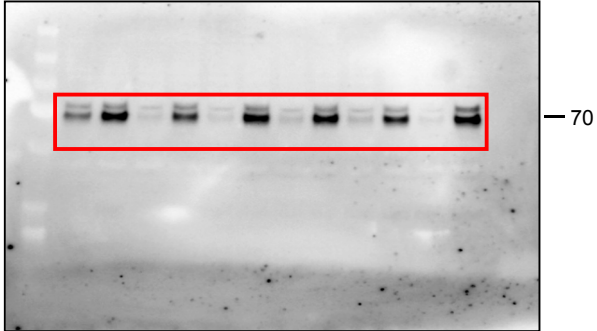

p70S6K (PI3K inhibitor)

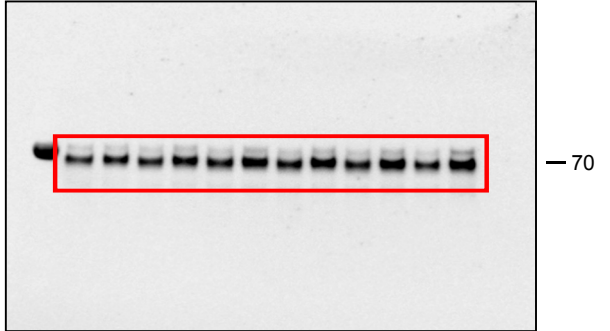

p-p70S6K (Thr389) (Akt inhibitor)

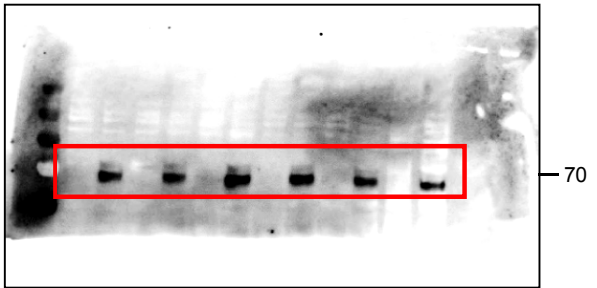

p-Akt (Ser473) (Akt inhibitor)

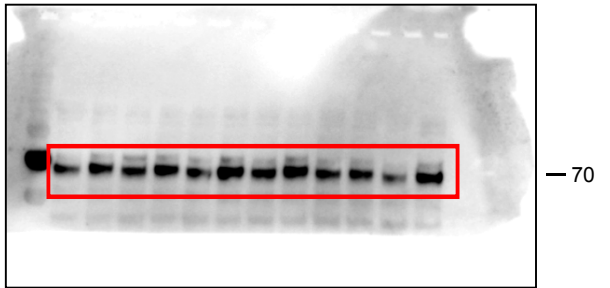

**Supplementary Figure 14: Supplementary Figure 4b uncropped western blots**

p-TSC2 S939 (Compound 2)

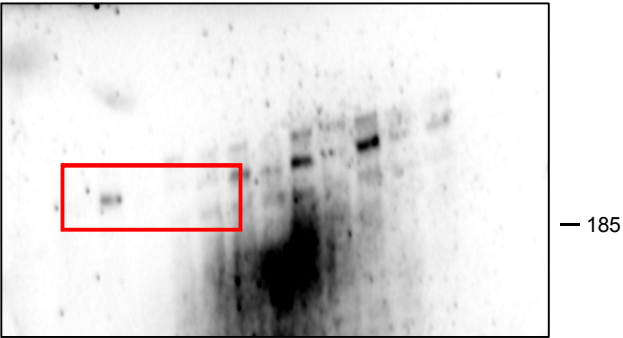

p-TSC2 S664 (Compound 2)

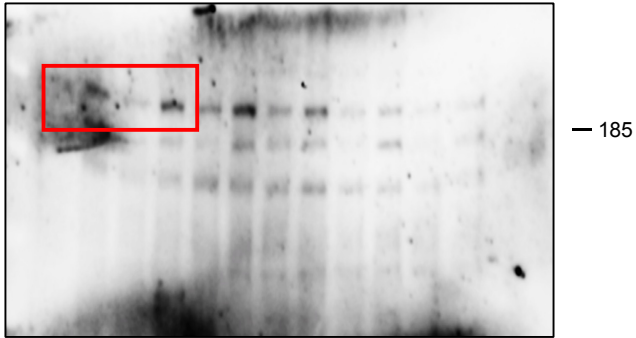

TSC2 (Compound 2)

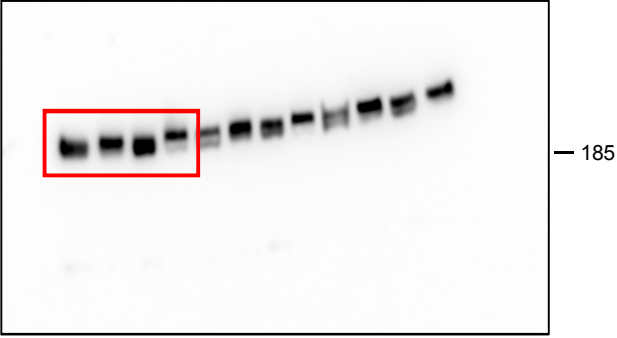

p-TSC2 S939 (MK2206)

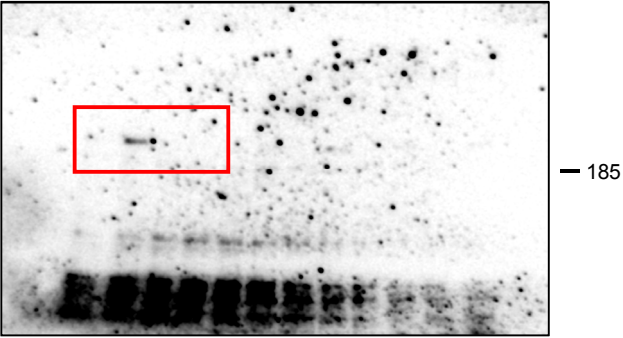

p-TSC2 S664 (MK2206)

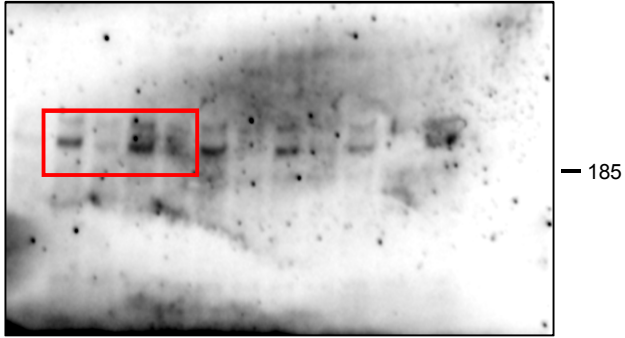

TSC2 (MK2206)

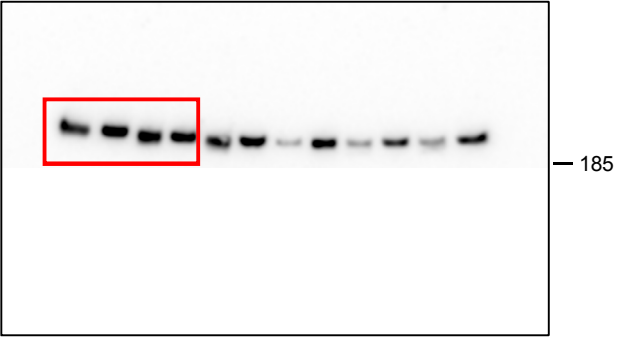

**Supplementary Figure 14: Supplementary Figure 4b uncropped western blots (continued)**

p-TSC2 S939 (GSK2334470)

p-TSC2 S664 (GSK2334470)

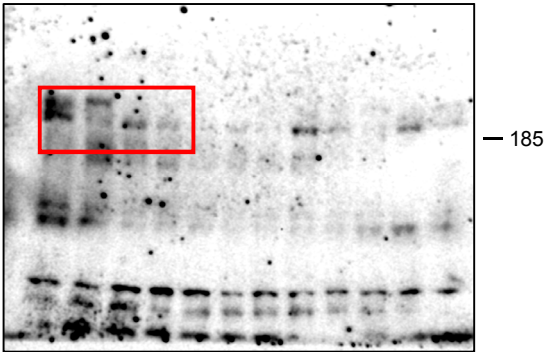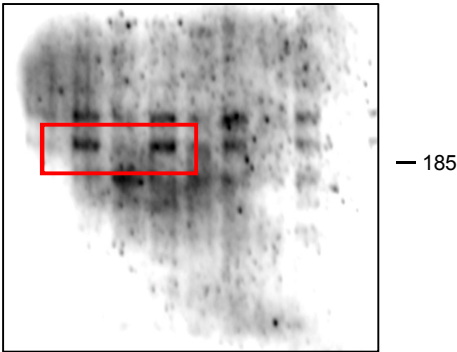

TSC2 (GSK2334470)

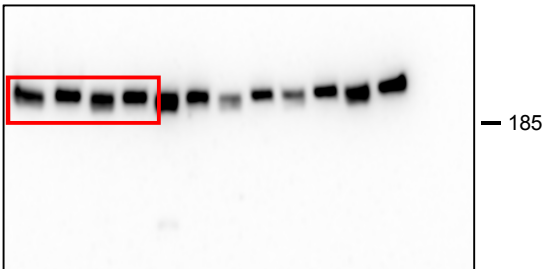

**Supplementary Figure 15: Supplementary Figure 5a uncropped western blots**

4E-BP1

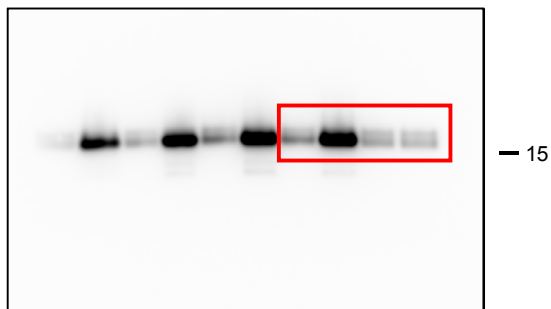

$\alpha$  tubulin

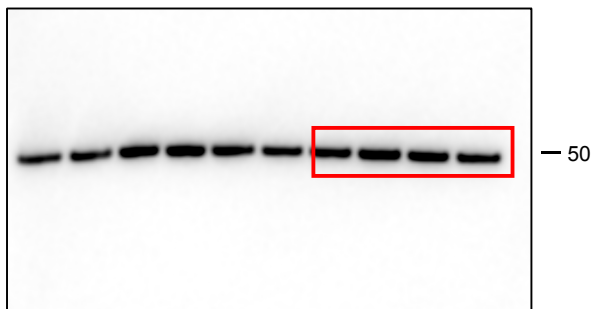

Supplement: 41467_2018_7858_MOESM1_ESM.pdf [file 41467_2018_7858_MOESM1_ESM.pdf]
